# Supplementary material for: A ring-fluorinated heptamethine cyanine dye: synthesis, photophysical properties, and vapochromic properties in response to ammonia
Source: Royal Society of Chemistry journal article supplement (doi:10.1039/d4ma00962b), 2024-01-01
Supplement: d4ma00962b1.pdf [file d4ma00962b1.pdf]

## Supplementary Information

### Ring-fluorinated heptamethine cyanine dye: Synthesis, photophysical properties, and vaporochromic properties in response to ammonia

Shouhei Ajioka,<sup>a</sup> Yuto Hagiyama,<sup>a</sup> Yuki Uehashi,<sup>a</sup> Tomohiro Agou,<sup>b</sup> Yasuhiro Kubota,<sup>a</sup> Toshiyasu Inuzuka,<sup>c</sup> and Kazumasa Funabiki\*<sup>a</sup>

<sup>a</sup> Department of Chemistry and Biomolecular Science, Gifu University, 1-1, Yanagido, Gifu 501-1193, Japan.

<sup>b</sup> Department of Material Science, Graduate School of Science, University of Hyogo, 3-2-1 Koto, Kamigori-cho, Ako, Hyogo 678-1297, Japan

<sup>c</sup> Division of Instrumental Analysis, Life Science Research Center, Gifu University, 1-1 Yanagido, Gifu 501-1193, Japan

#### (Contents)

|                                                                                        |            |
|----------------------------------------------------------------------------------------|------------|
| <sup>1</sup> H, <sup>13</sup> C, <sup>19</sup> F NMR and IR for <b>1</b> .....         | p. S2-S3   |
| <sup>1</sup> H, <sup>13</sup> C, <sup>19</sup> F NMR, IR, and HRMS for <b>2a</b> ..... | p. S4-S6   |
| <sup>1</sup> H, <sup>13</sup> C NMR, and IR for <b>2b</b> .....                        | p. S7-S8   |
| <sup>1</sup> H, <sup>13</sup> C NMR, and IR for <b>3</b> .....                         | p. S9-S10  |
| <sup>1</sup> H, <sup>13</sup> C, <sup>19</sup> F NMR, IR, and HRMS for <b>4a</b> ..... | p. S11-S13 |
| <sup>1</sup> H, <sup>13</sup> C, <sup>19</sup> F NMR, IR, and HRMS for <b>4b</b> ..... | p. S14-S16 |
| <sup>1</sup> H, <sup>13</sup> C NMR, and IR for <b>5b</b> .....                        | p. S17-S18 |
| Fluorescence decay curves.....                                                         | p. S19     |
| Packings of molecules in single crystal X-ray analysis.....                            | p. S20-S21 |
| ORTEP diagram for <b>4a</b> .....                                                      | p. S22     |
| Crystal data and structure refinement for <b>4a</b> .....                              | p. S23     |
| ORTEP diagram for <b>4b</b> .....                                                      | p. S24     |
| Crystal data and structure refinement for <b>4b</b> .....                              | p. S25     |
| TG-DTA for <b>4a,b</b> .....                                                           | p. S26     |
| Cyclic voltammograms for <b>4a,b</b> .....                                             | p. S27     |
| Computational calculation data for <b>4a,b</b> .....                                   | p. S28-S31 |

# 4,5,6,7-Tetrafluoro-2,3,3-trimethyl-3H-indole (1)

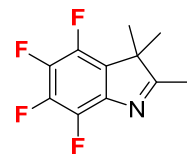

## <sup>1</sup>H NMR

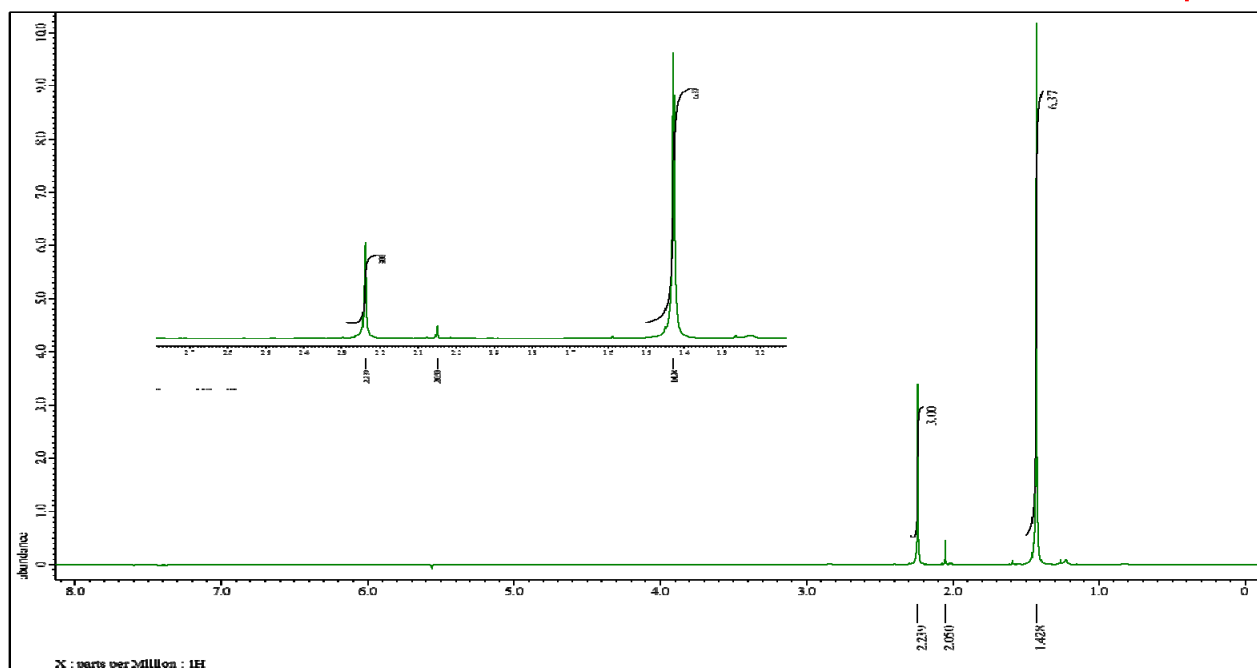

## <sup>13</sup>C NMR

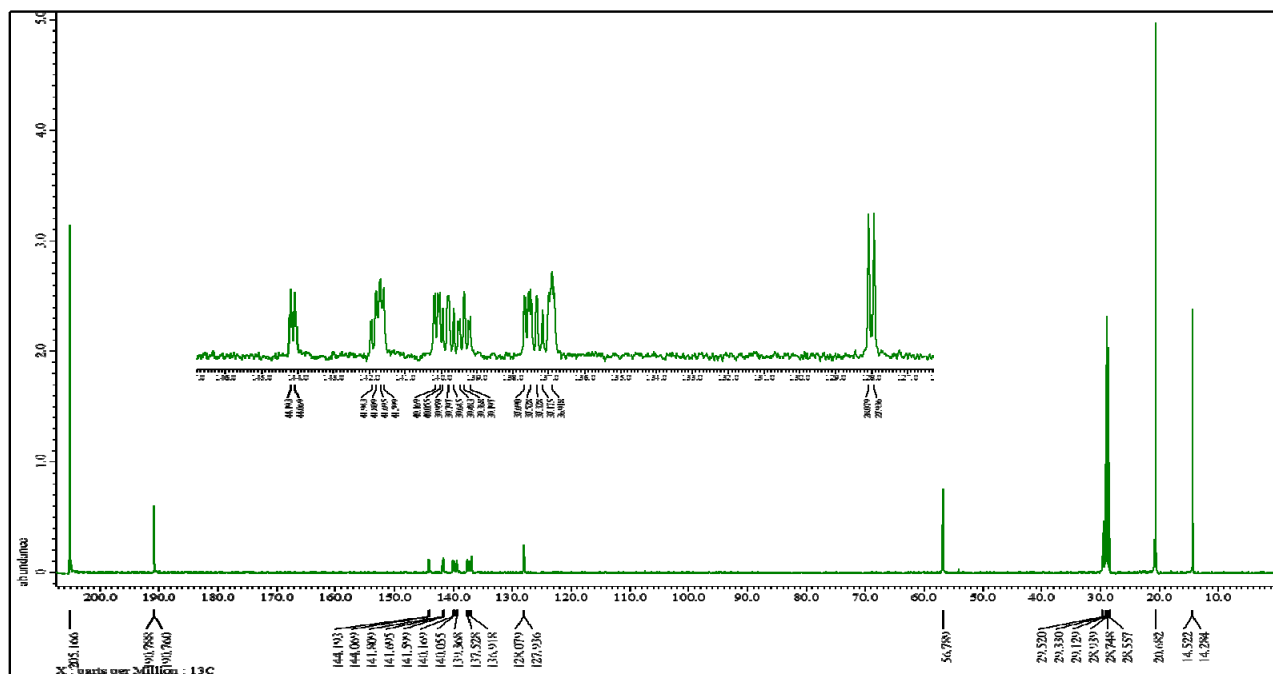

# <sup>19</sup>F NMR

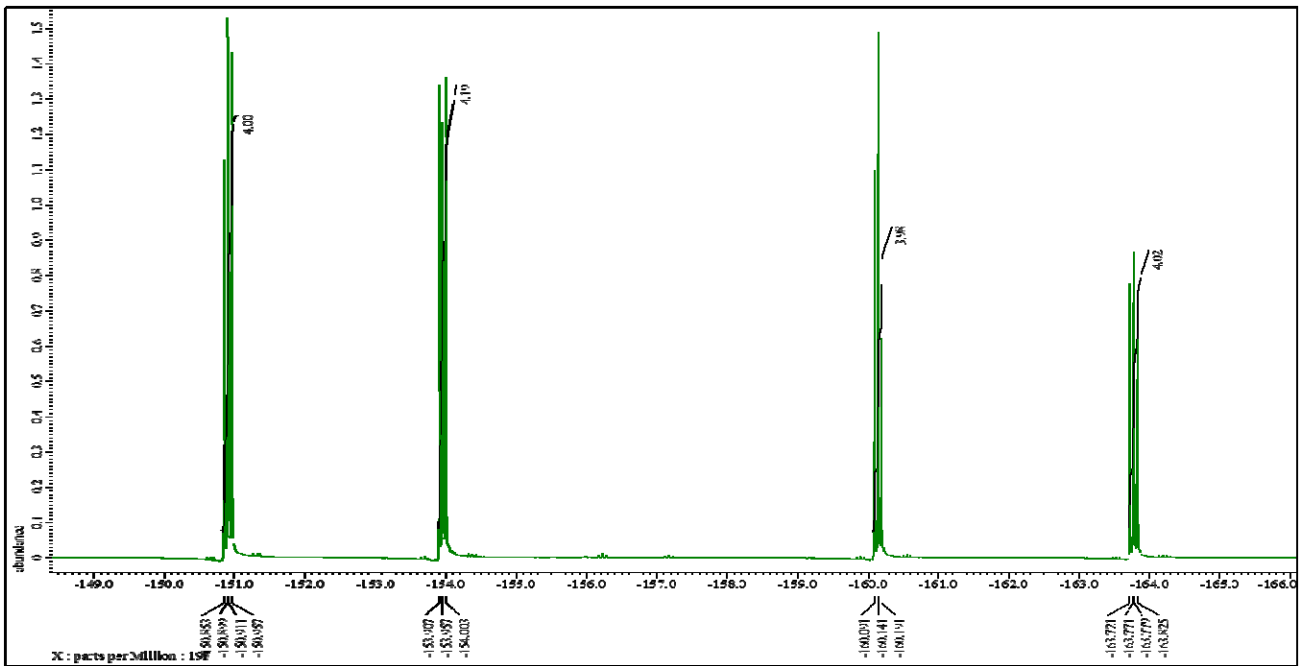

# IR

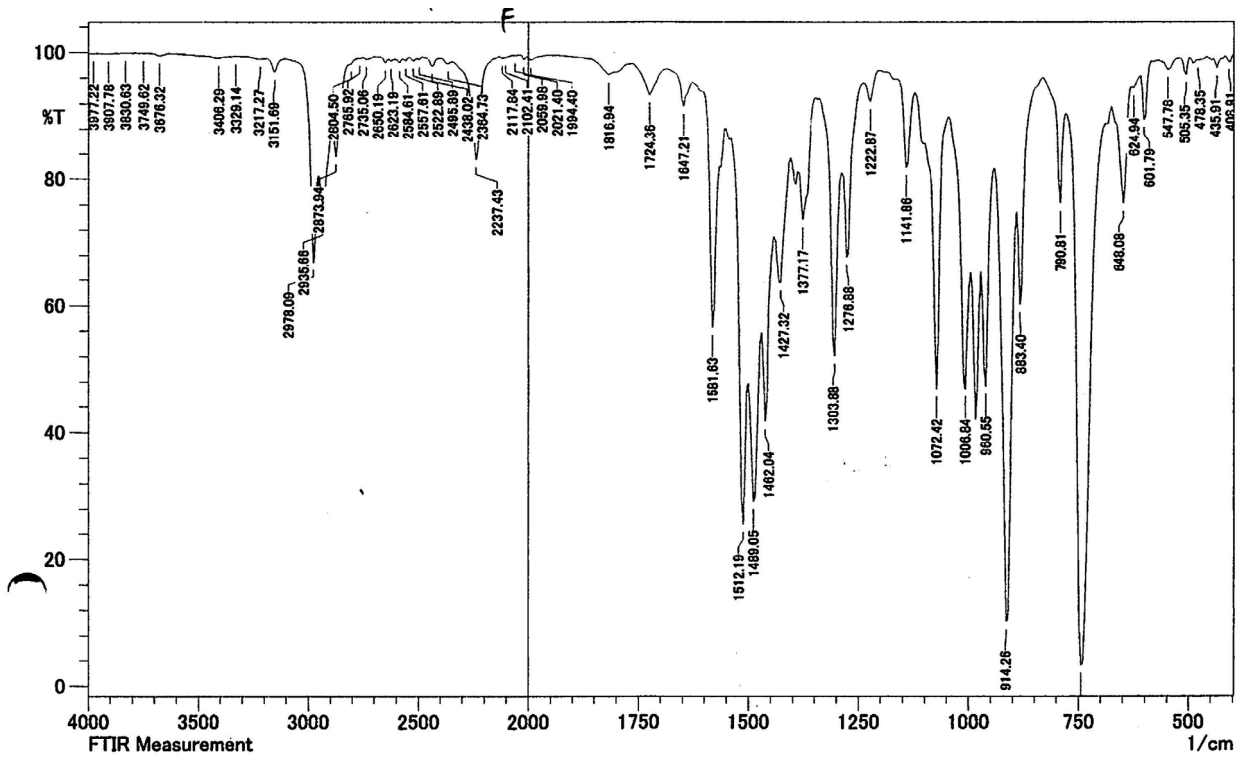

# 4,5,6,7-Tetrafluoro-1,2,3,3-tetramethyl-3H-indol-1-ium tetrafluoroborate (2a)

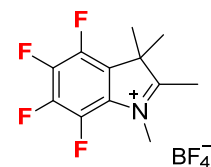

## <sup>1</sup>H NMR

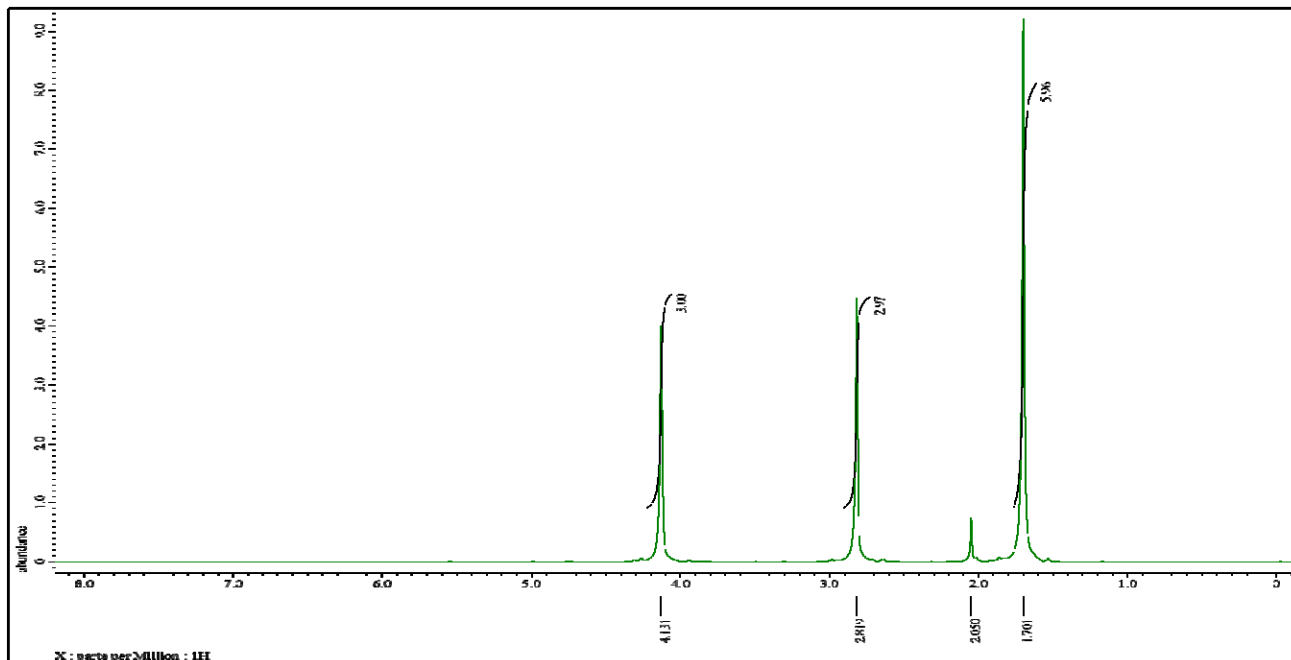

## <sup>13</sup>C NMR

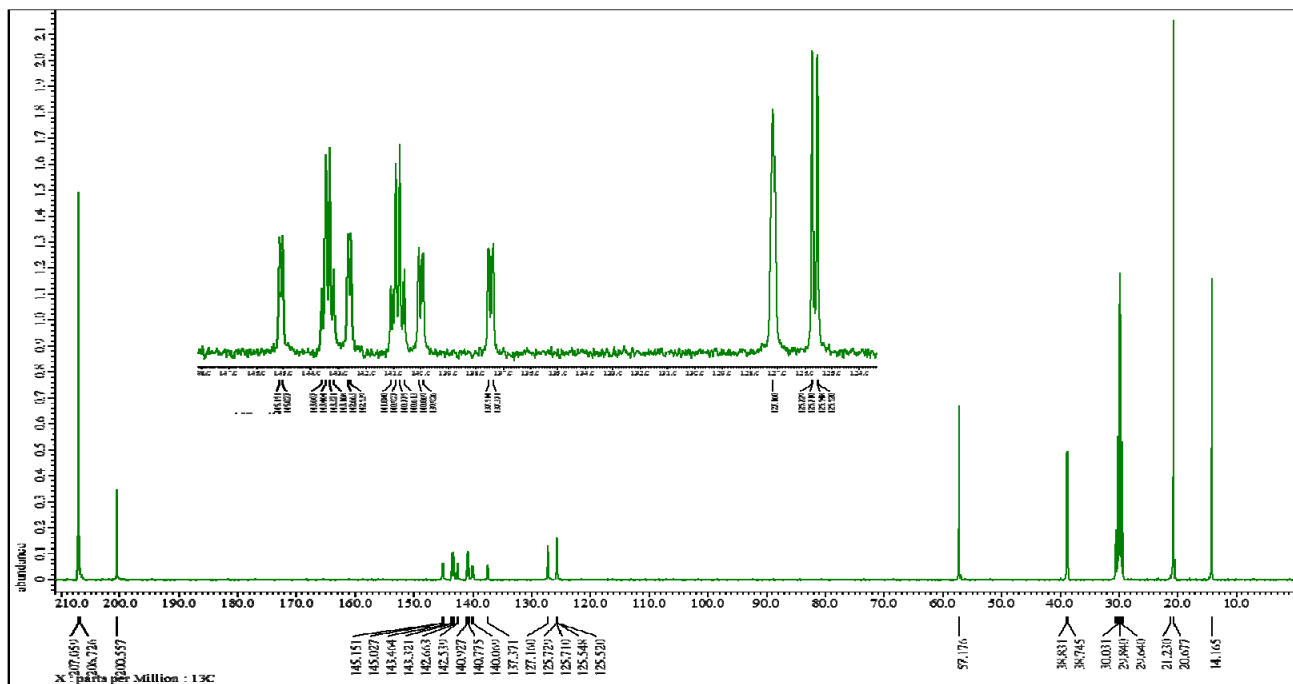

# <sup>19</sup>F NMR

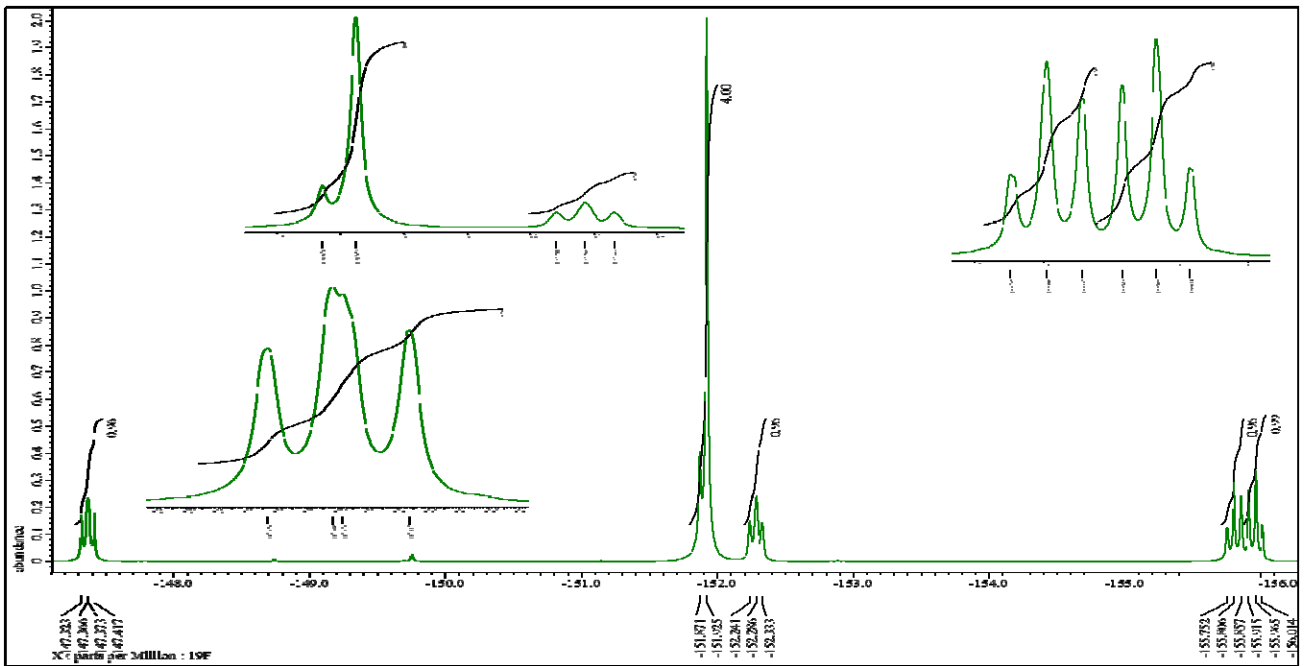

# IR

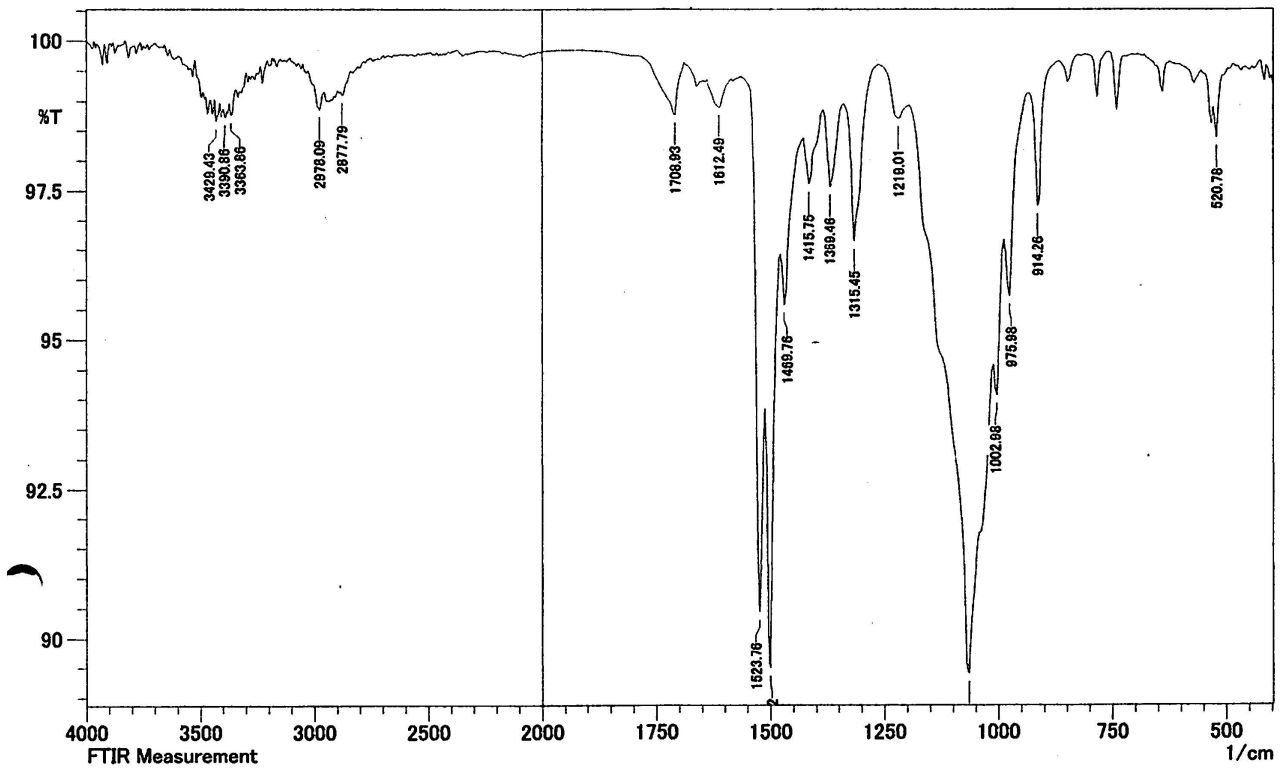

Elemental Composition Report

Single Mass Analysis

Tolerance = 1000.0 PPM / DBE: min = -1.5, max = 200.0  
Element prediction: Off  
Number of isotope peaks used for i-FIT = 3

Monoisotopic Mass, Even Electron Ions

2 formula(e) evaluated with 1 results within limits (all results (up to 1000) for each mass)

Elements Used:

C: 12-12 H: 12-13 N: 1-1 19F: 4-4 Na: 0-1

20190830p-2-2 8 (0.284)

1: TOF MS ES+

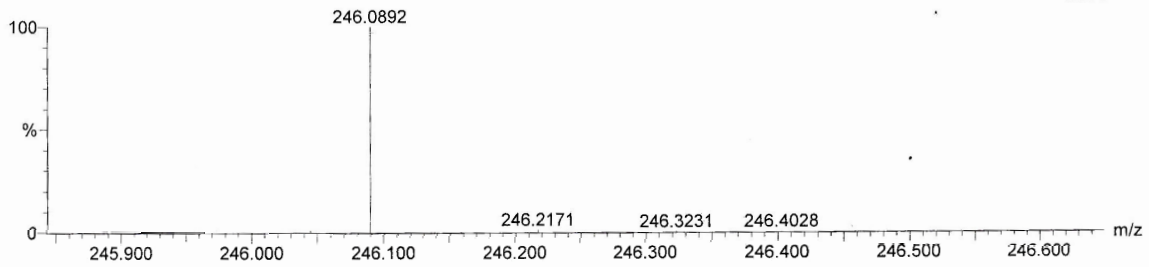

Minimum: -1.5  
Maximum: 10.0 1000.0 200.0

| Mass     | Calc. Mass | mDa  | PPM  | DBE | i-FIT | i-FIT (Norm) | Formula        |
|----------|------------|------|------|-----|-------|--------------|----------------|
| 246.0892 | 246.0906   | -1.4 | -5.7 | 5.5 | 53.4  | 0.0          | C12 H12 N 19F4 |

# 1,2,3,3-Tetramethyl-3*H*-indol-1-ium tetrafluoroborate (2b)<sup>1</sup>

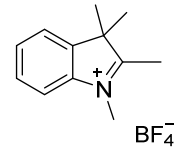

## <sup>1</sup>H NMR

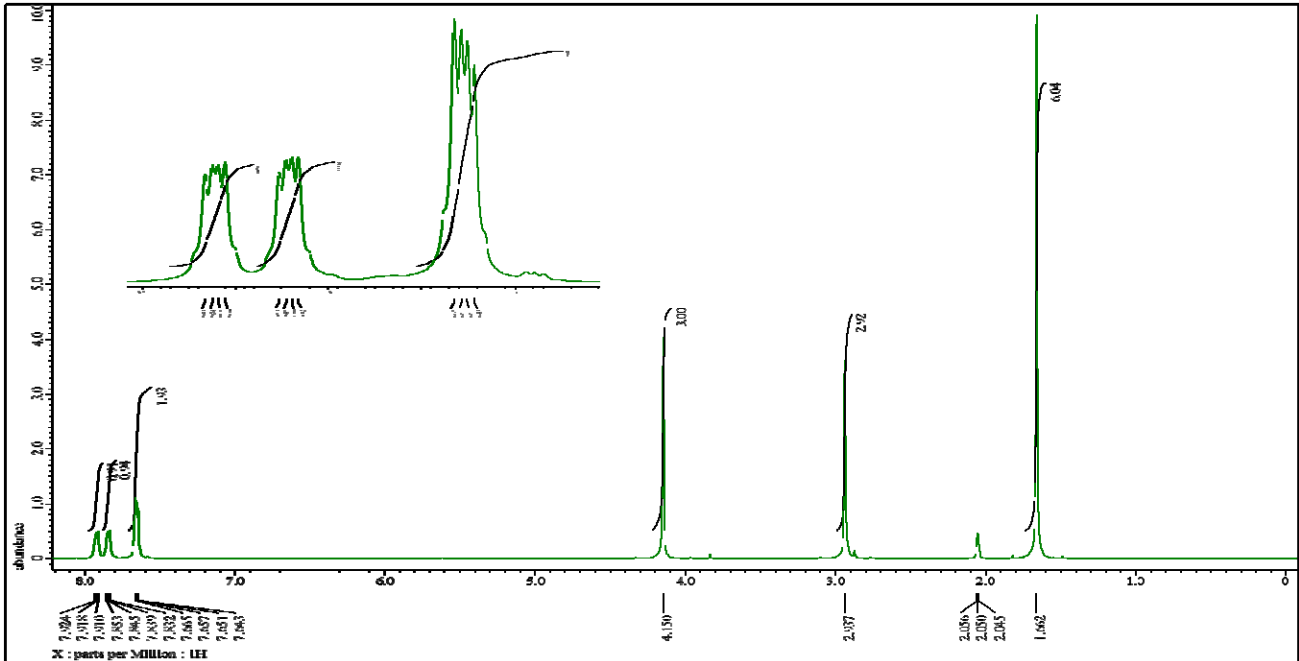

## <sup>13</sup>C NMR

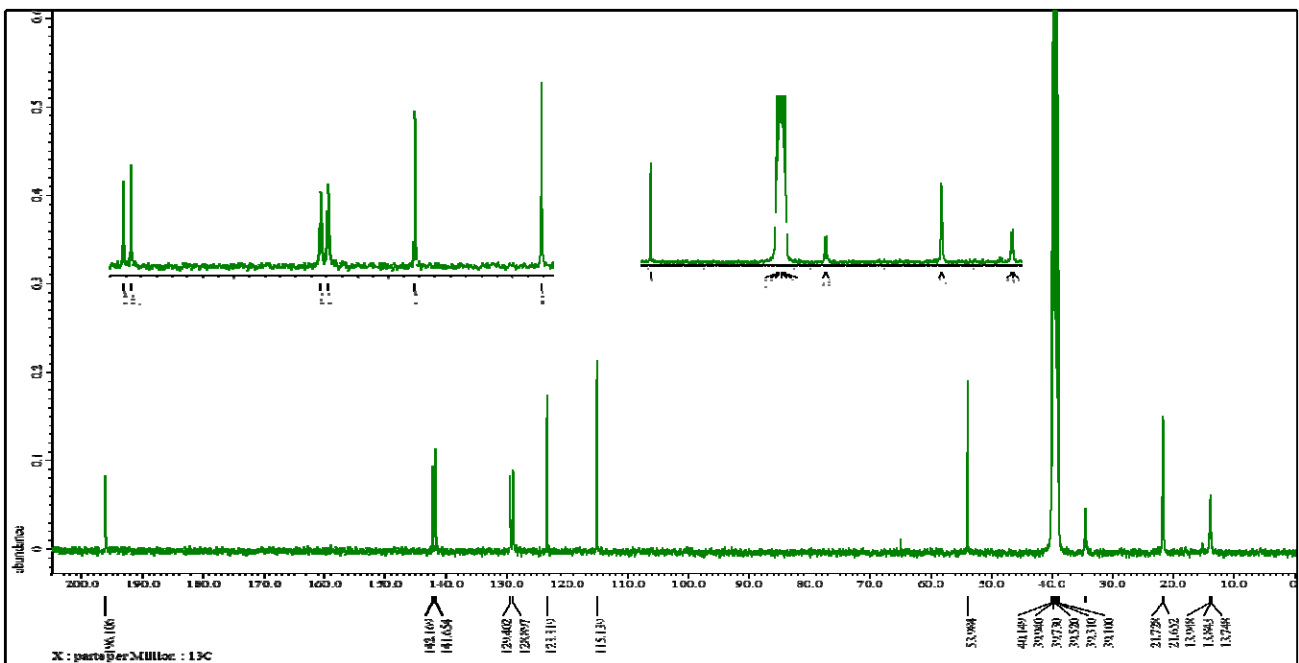

<sup>1</sup> C. Reichardt, H. -D. Engel, *Chem. Ber.* **1998**, 121, 1009-1011.

# $^{19}\text{F}$ NMR

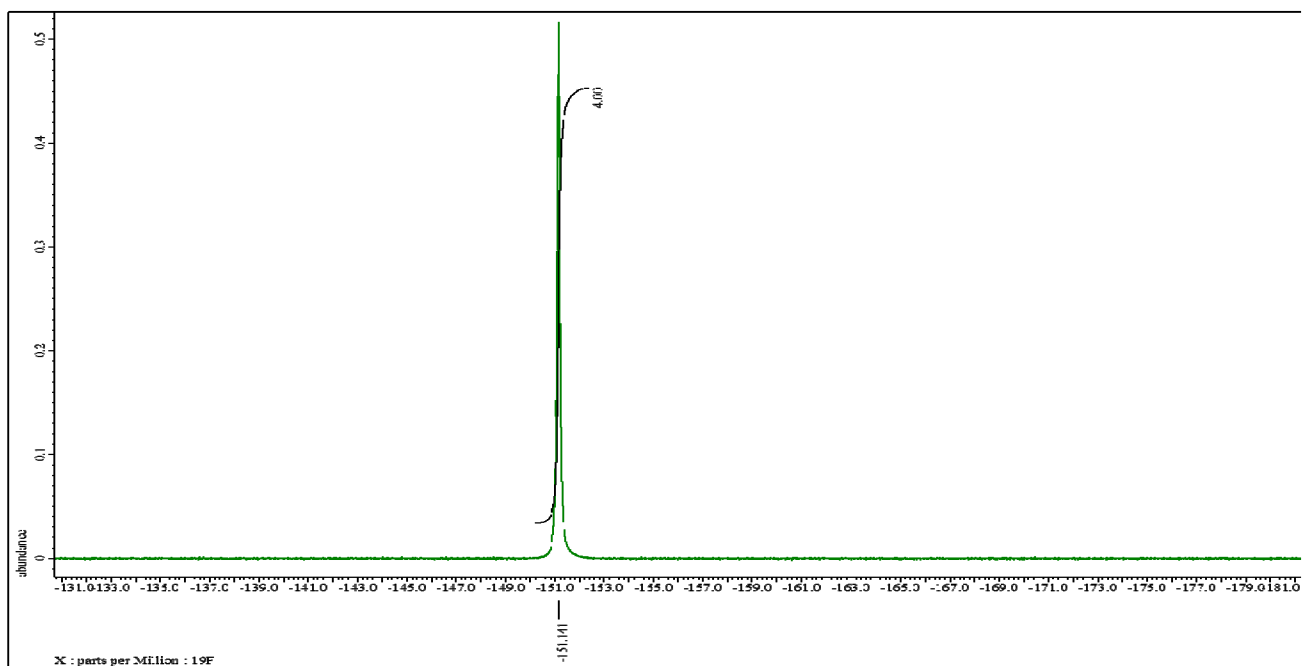

# IR

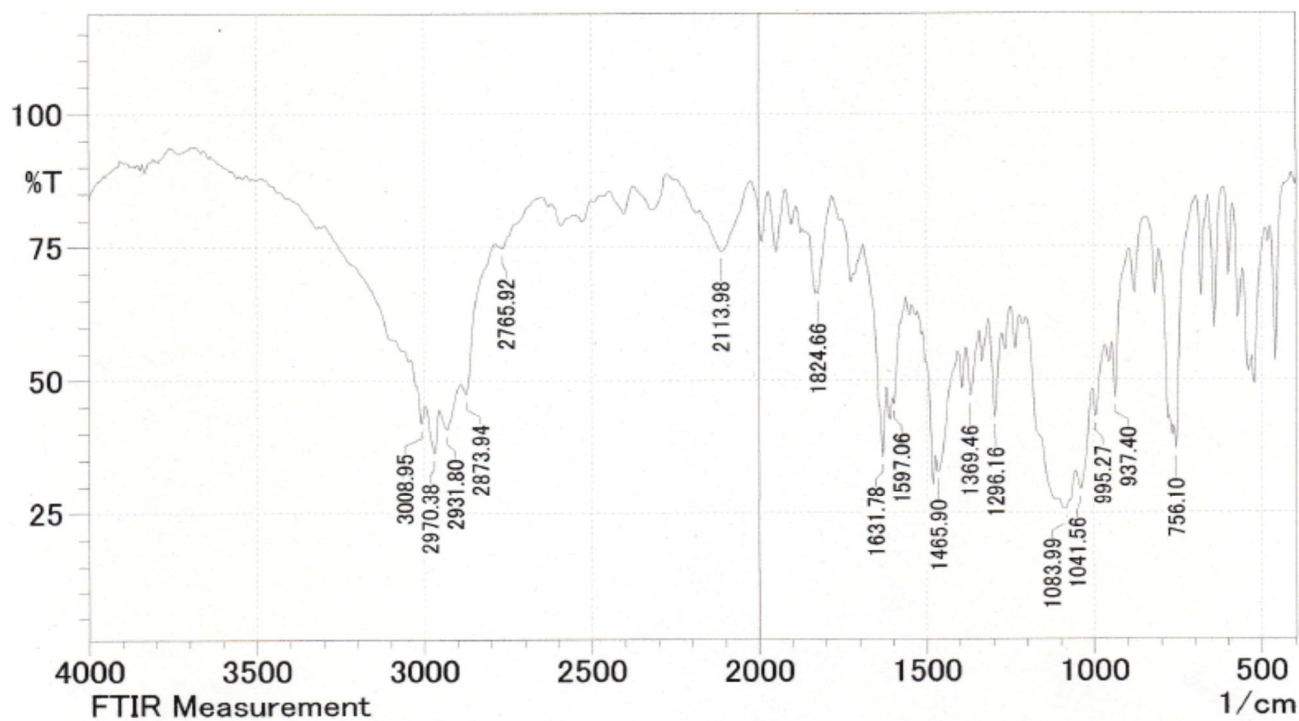



**(E)-2-Chloro-3-(hydroxymethylene)cyclohex-1-enecarbaldehyde (3)<sup>2</sup>**

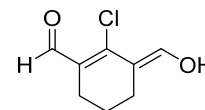

**<sup>1</sup>H NMR**

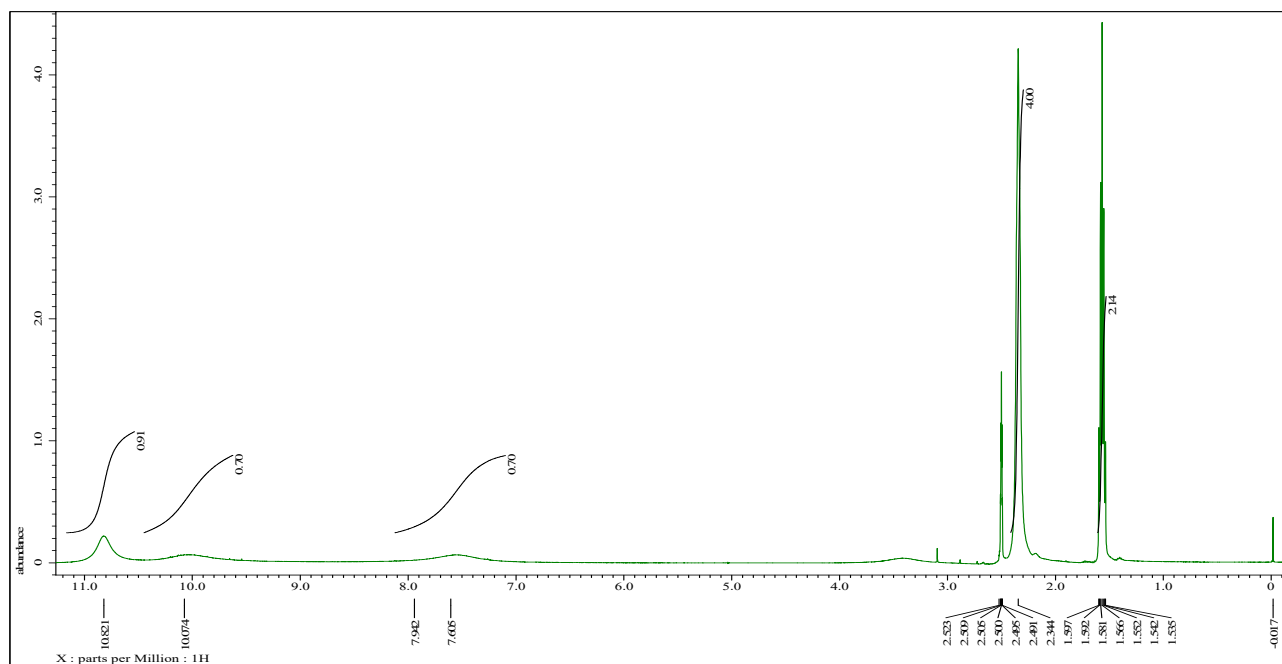

**<sup>13</sup>C NMR**

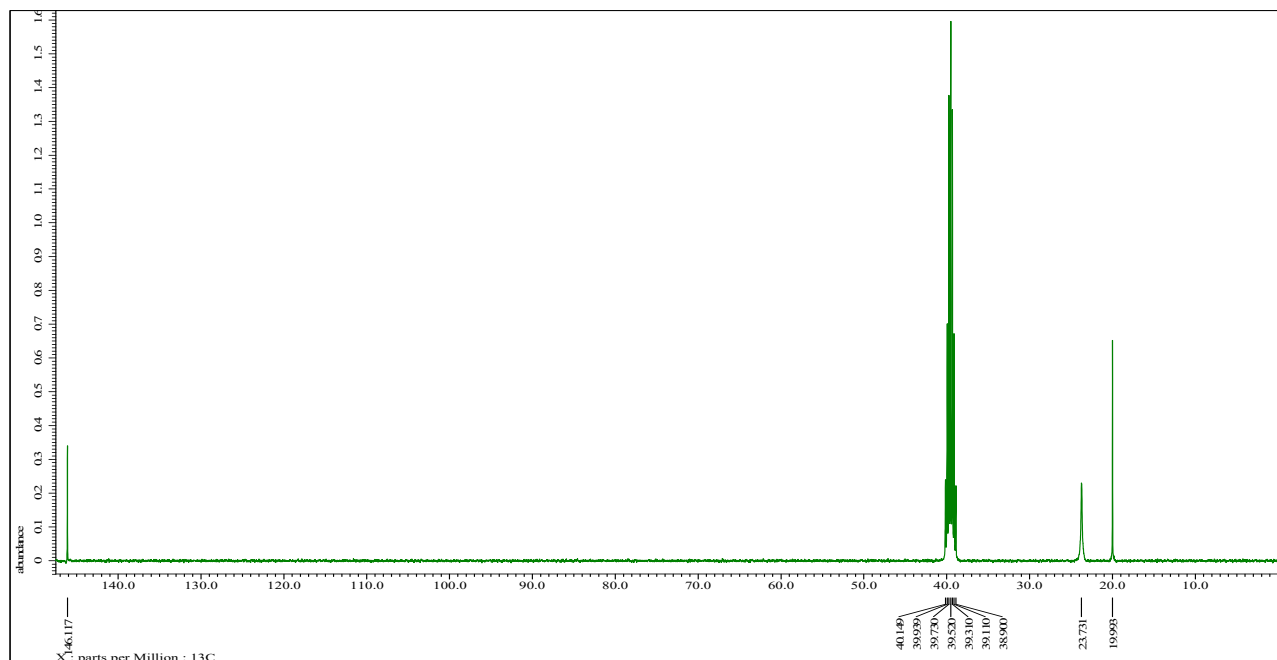

<sup>2</sup> N. Y. Kang, S. J. Park, X. W. E. Ang, A. Samanta, W. H. P. Driessen, V. Ntziachristos, K. O. Vasquez, J. D. Peterson, S. W. Yun, Y. T. Chang, *Chem Commun.* **2014**, 50, 6589-6591.

# IR

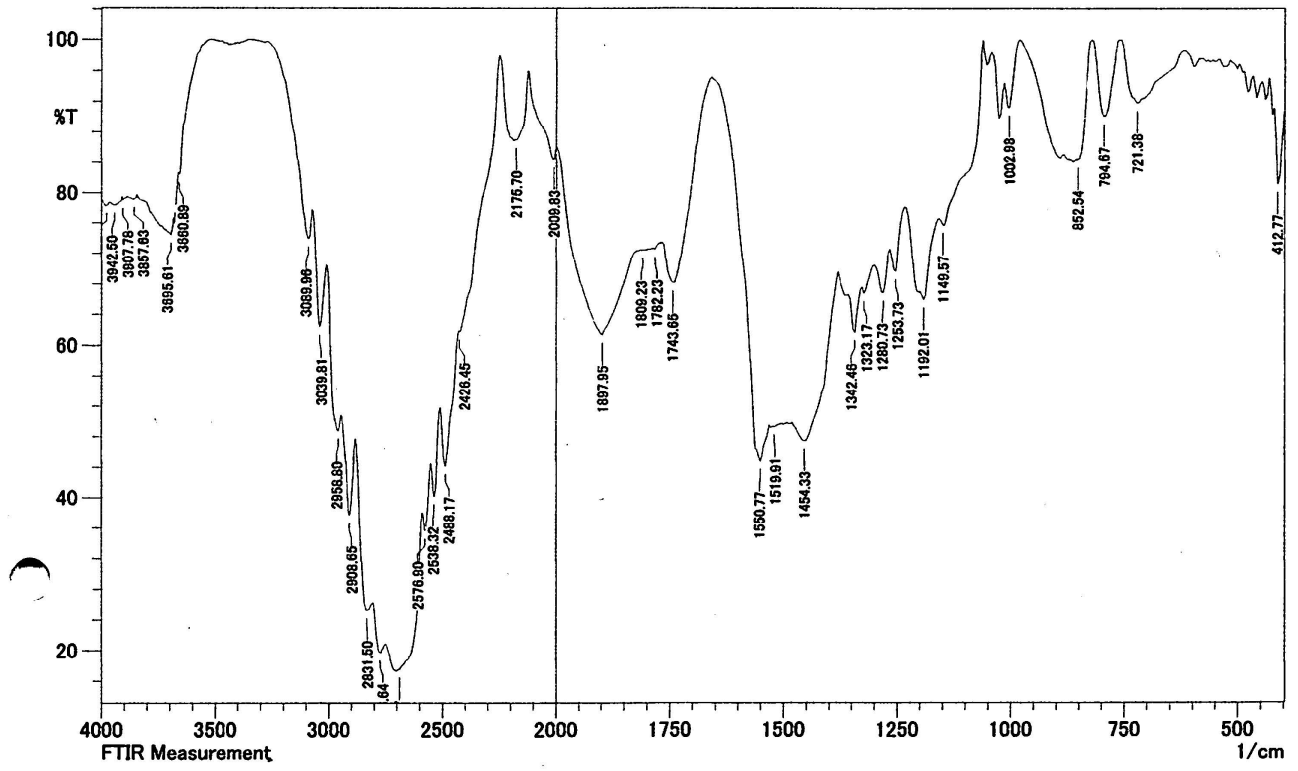

2-((*E*)-2-((*E*)-2-Chloro-3-(2-((*E*)-4,5,6,7-tetrafluoro-1,3,3-trimethylindolin-2-ylidene)ethylidene)cyclohex-1-en-1-yl)vinyl)-4,5,6,7-tetrafluoro-1,3,3-trimethyl-3*H*-indol-1-ium tetrafluoroborate (4a)

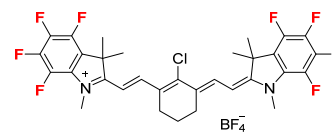

<sup>1</sup>H NMR

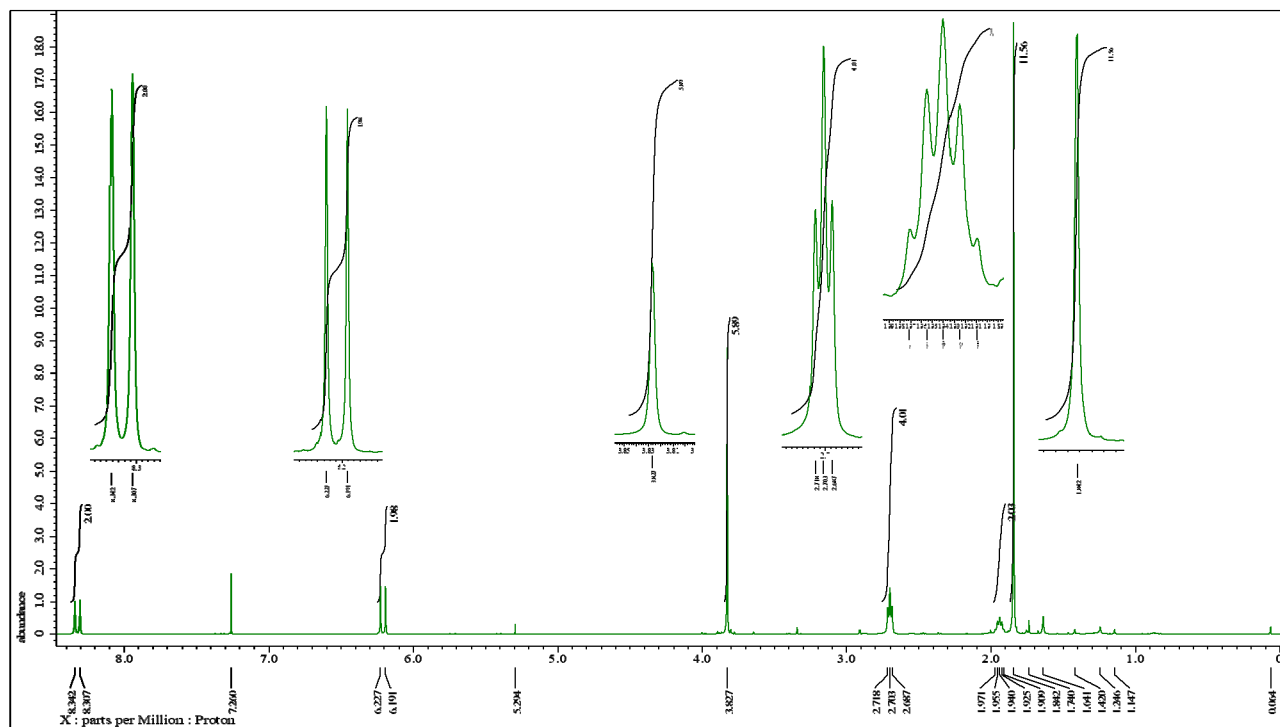

<sup>13</sup>C NMR

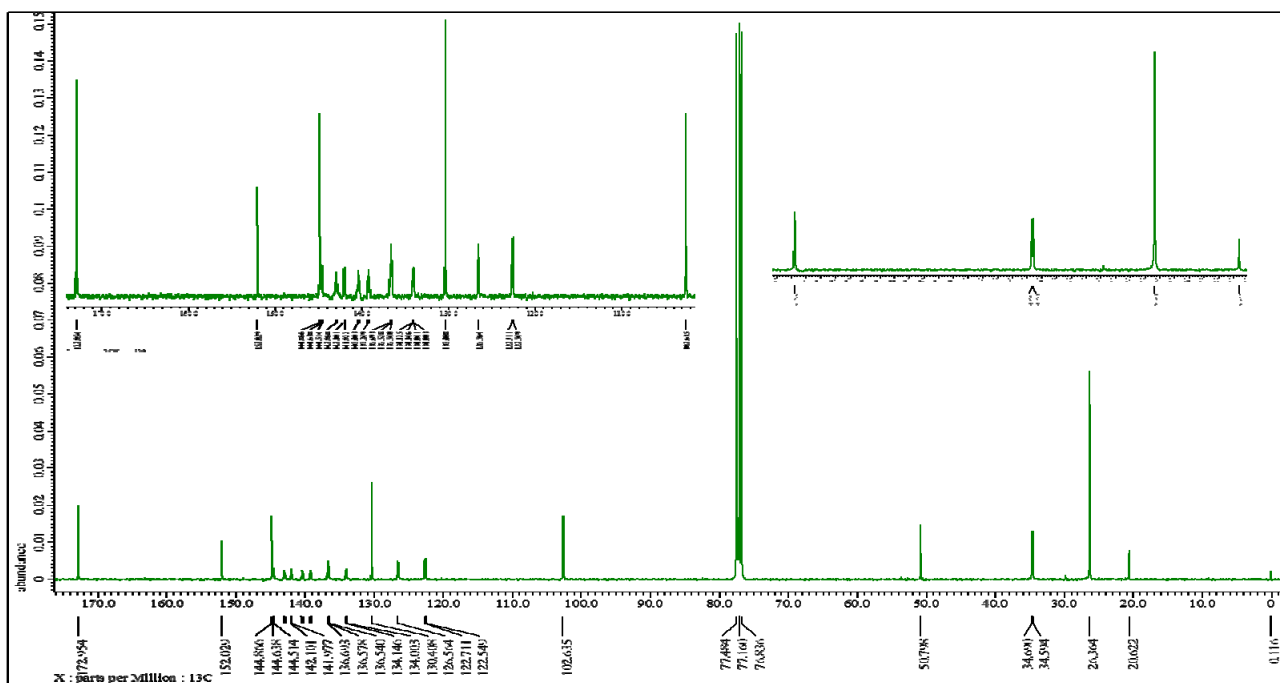

<sup>19</sup>F NMR

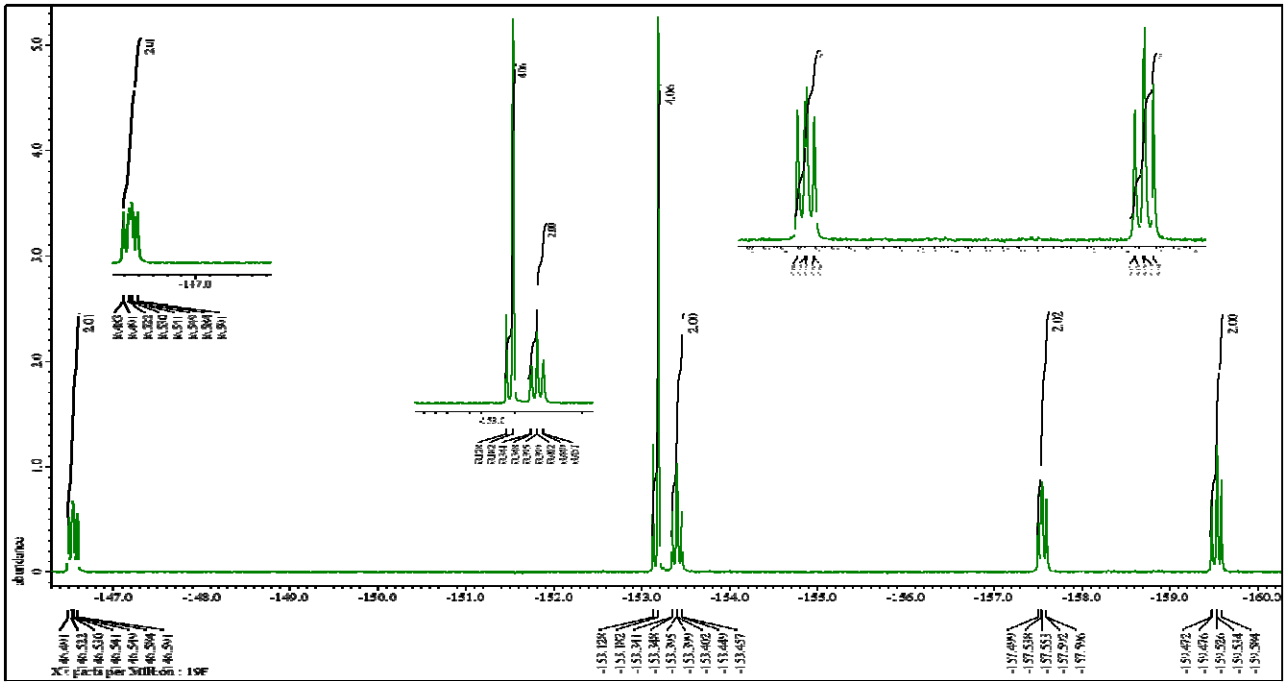

IR

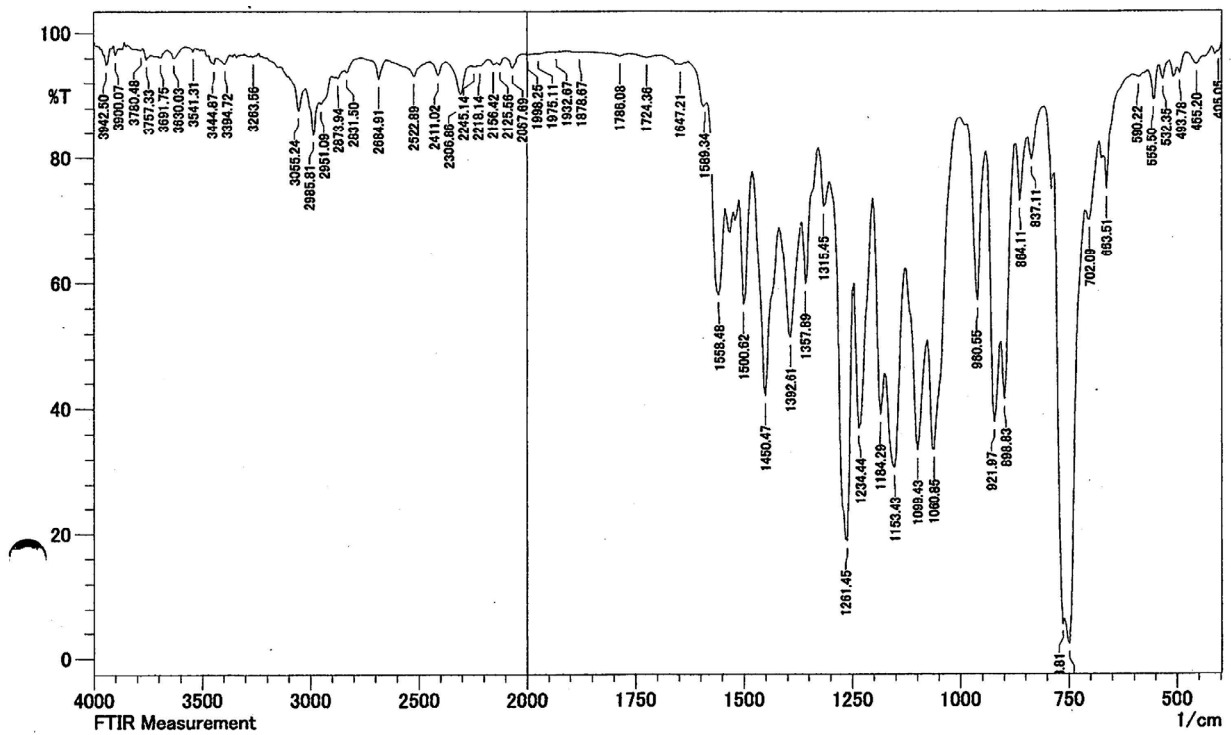

# HRMS

データ: 20181113\_ajioka\_F8

試料名:

説明:

イオン化モード: ESI+

処理履歴: m/z軸決定[ピーク検出[重心,30,面積];ベース補正[1.0%];平滑化[3]...

測定日時: 2018/11/13 16:44:08

測定者: AccuTOF

質量校正データ: PEGMIX\_ESI+\_1000...

作成日時: 2018/11/13 16:58:16

作成者: AccuTOF

電荷数: 1

許容誤差: 500.00(mmu)

不飽和数: -20.0 .. 20.0 (端数: 両方)

元素: <sup>12</sup>C:32 .. 32, <sup>1</sup>H:28 .. 28, <sup>35</sup>Cl:1 .. 1, <sup>19</sup>F:8 .. 8, <sup>14</sup>N:2 .. 2

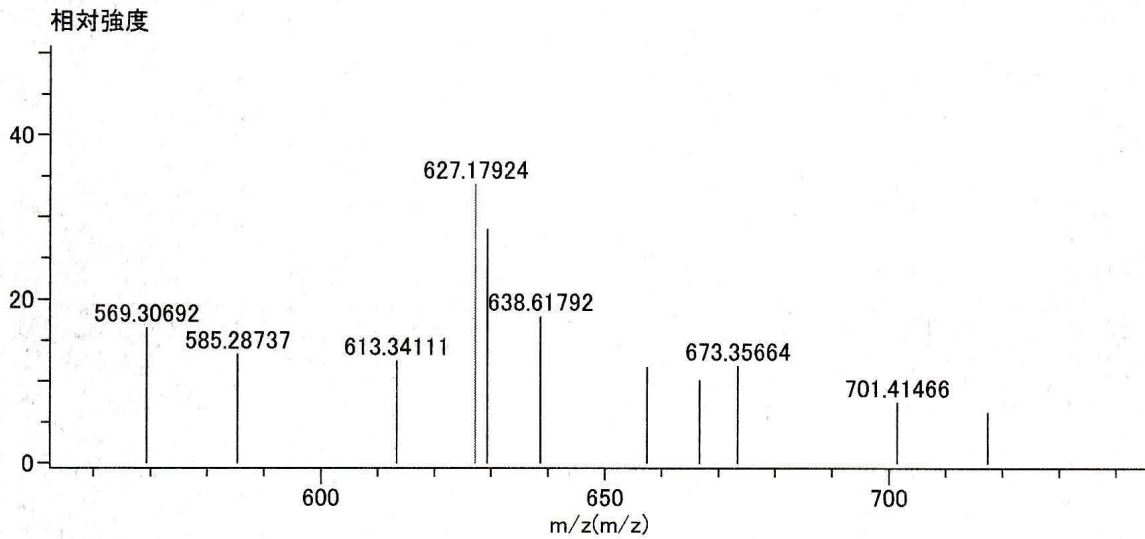

| Mass      | 強度      | Calc. Mass | 質量差<br>mmu | 質量差<br>ppm | Formula                                                                                                                                            | 不飽和数 |
|-----------|---------|------------|------------|------------|----------------------------------------------------------------------------------------------------------------------------------------------------|------|
| 627.17924 | 9503.12 | 627.18133  | -2.08      | -3.32      | <sup>12</sup> C <sub>32</sub> <sup>1</sup> H <sub>28</sub> <sup>35</sup> Cl <sub>1</sub> <sup>19</sup> F <sub>8</sub> <sup>14</sup> N <sub>2</sub> | 15.5 |

2-((*E*)-2-((*E*)-2-Chloro-3-(2-((*E*)-1,3,3-trimethylindolin-2-ylidene)ethylidene)cyclohex-1-en-1-yl)vinyl)-1,3,3-trimethyl-3*H*-indol-1-ium tetrafluoroborate (4b)

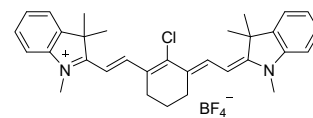

<sup>1</sup>H NMR

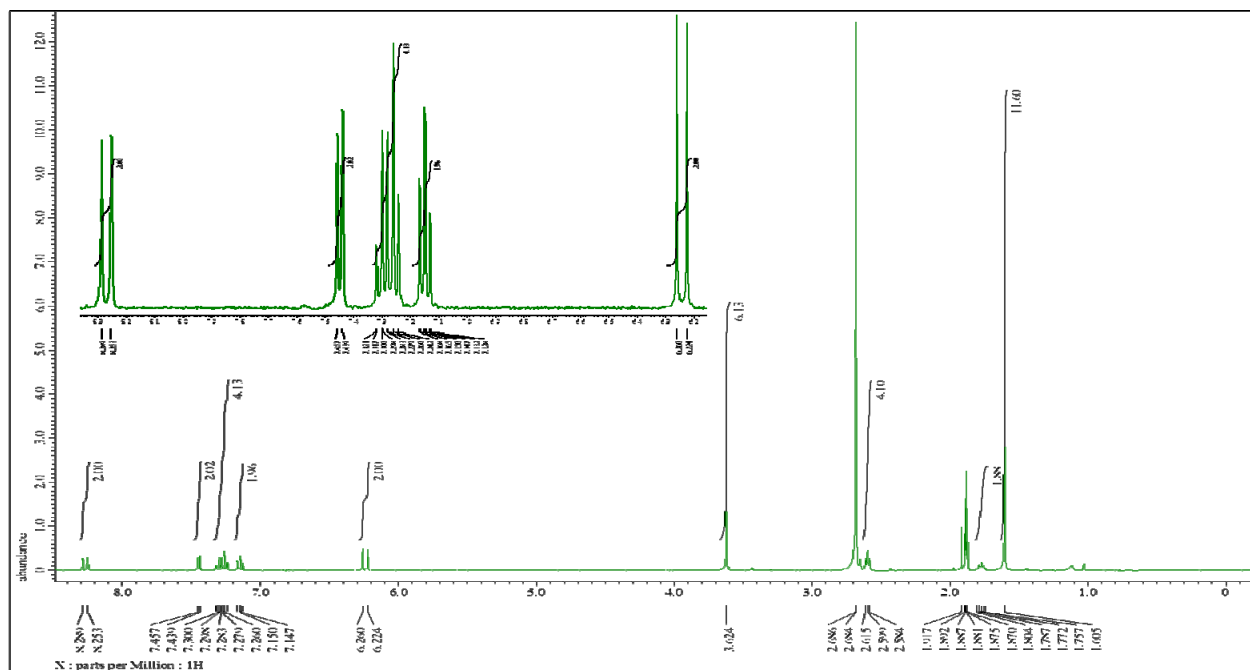

<sup>13</sup>C NMR

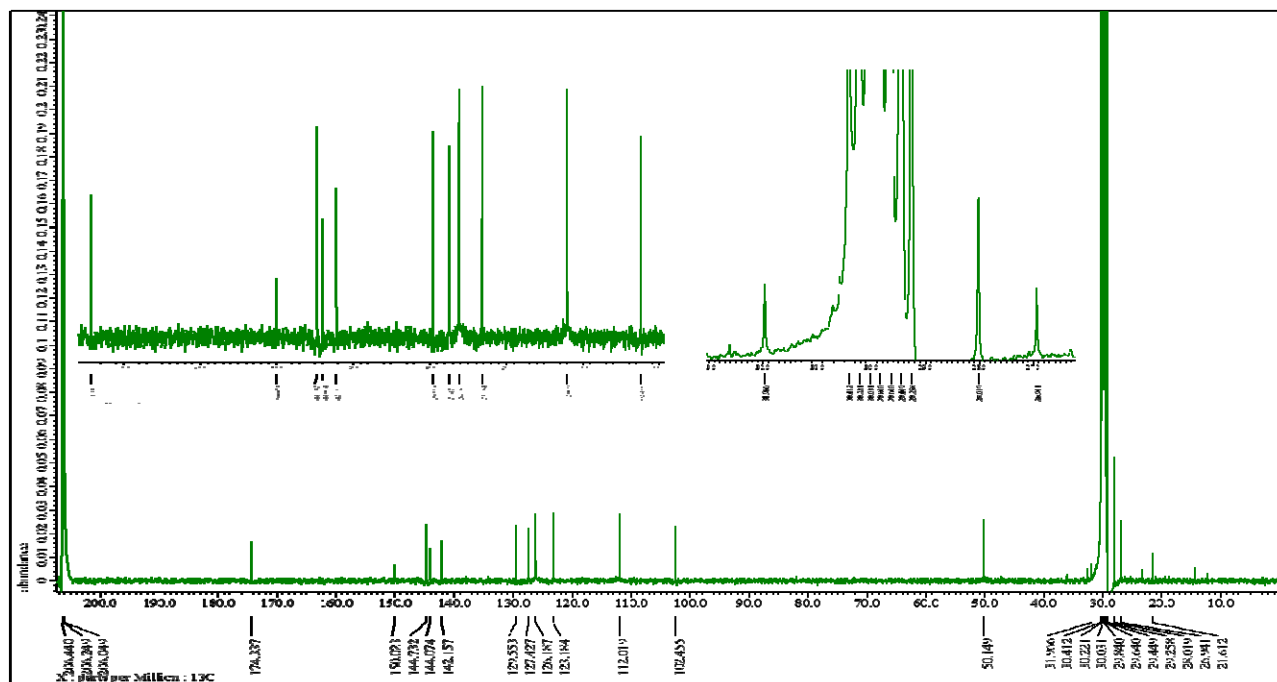

# $^{19}\text{F}$ NMR

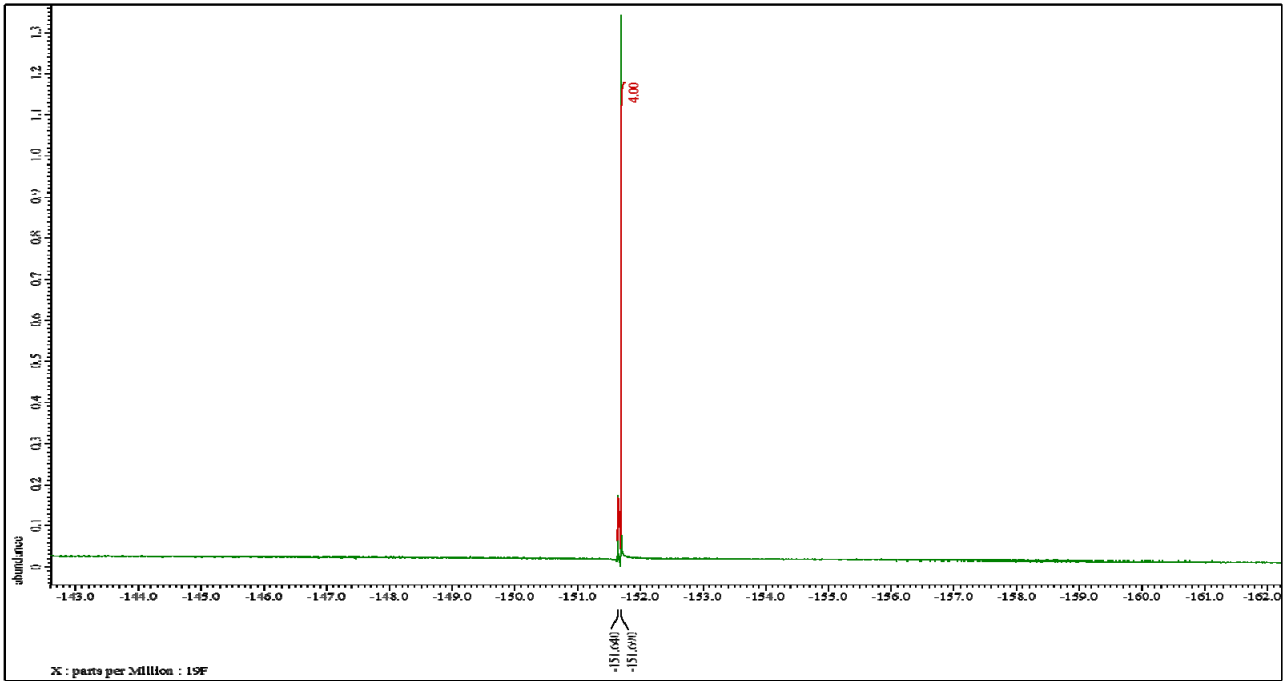

# IR

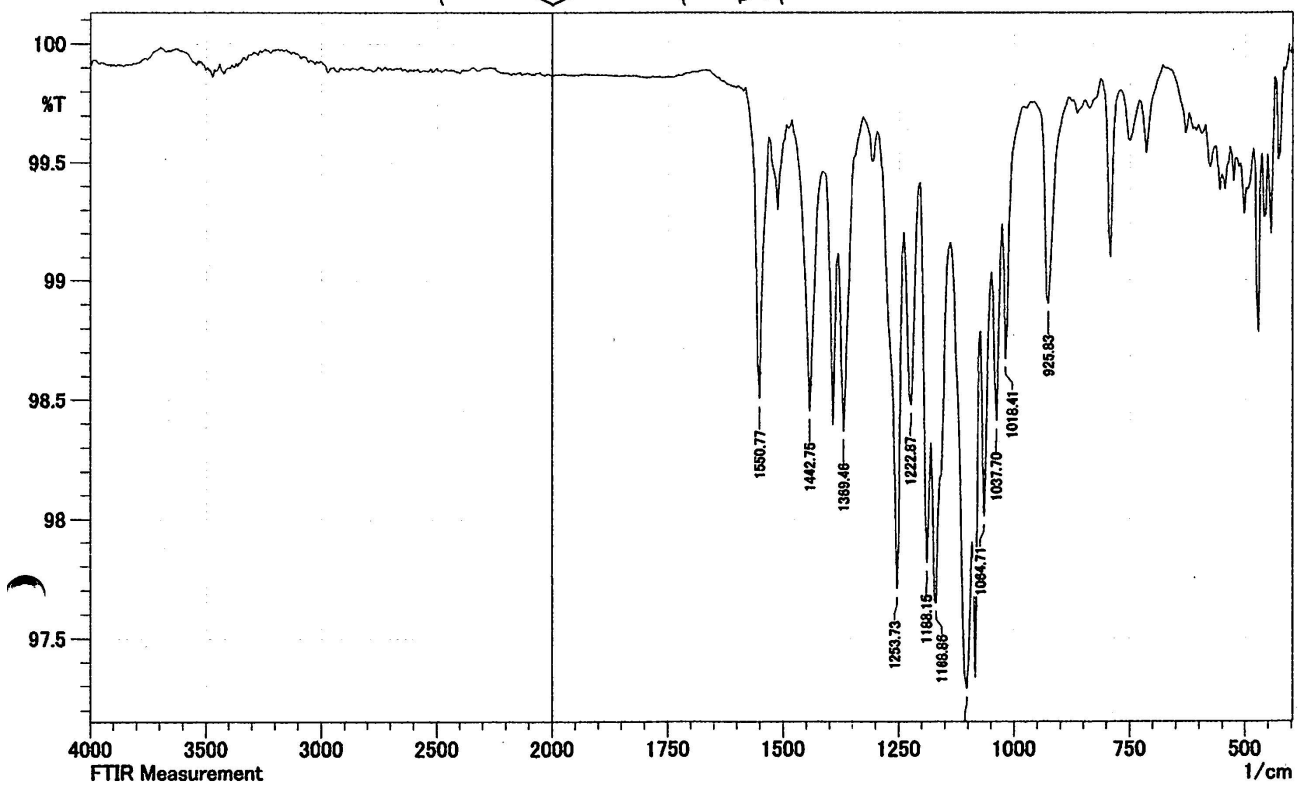

# HRMS

データ: ajioka BF4 F0 20190219

試料名:

説明:

イオン化モード: ESI+

処理履歴: m/z軸決定[ピーク検出[重心,30,面積];ベース補正[1.0%];平滑化[3]...

測定日時: 2019/02/19 13:47:11

測定者: AccuTOF

質量校正データ: PEGMIX\_ESI+\_1000...

作成日時: 2019/02/19 13:59:37

作成者: AccuTOF

電荷数: 1

許容誤差: 500.00(mmu)

不飽和数: -30.0 .. 30.0 (端数: 両方)

元素: <sup>12</sup>C:32 .. 32, <sup>1</sup>H:36 .. 36, <sup>35</sup>Cl:1 .. 1, <sup>14</sup>N:2 .. 2, <sup>16</sup>O:0 .. 0

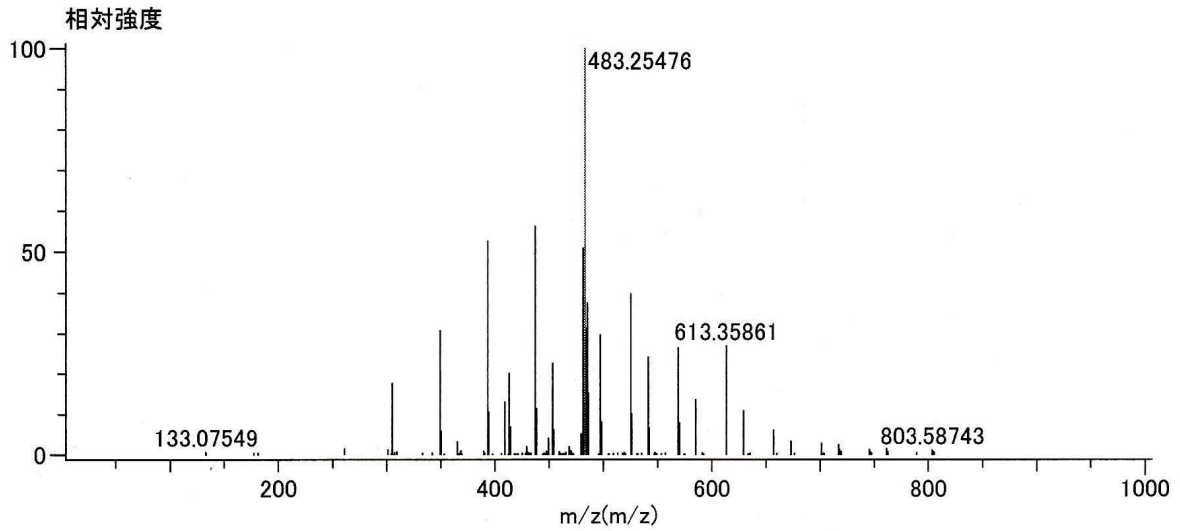

| Mass      | 強度       | Calc. Mass | 質量差<br>mmu | 質量差<br>ppm | Formula                                                                                                               | 不飽和数 |
|-----------|----------|------------|------------|------------|-----------------------------------------------------------------------------------------------------------------------|------|
| 483.25476 | 70742.11 | 483.25670  | -1.94      | -4.02      | <sup>12</sup> C <sub>32</sub> <sup>1</sup> H <sub>36</sub> <sup>35</sup> Cl <sub>1</sub> <sup>14</sup> N <sub>2</sub> | 15.5 |



**(E)-2-chloro-3-(2-((E)-1,3,3-trimethylindolin-2-ylidene)ethylidene)cyclohex-1-ene-1-carbaldehyde (5b)<sup>3</sup>**

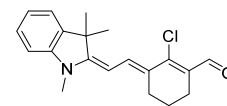

**<sup>1</sup>H NMR**

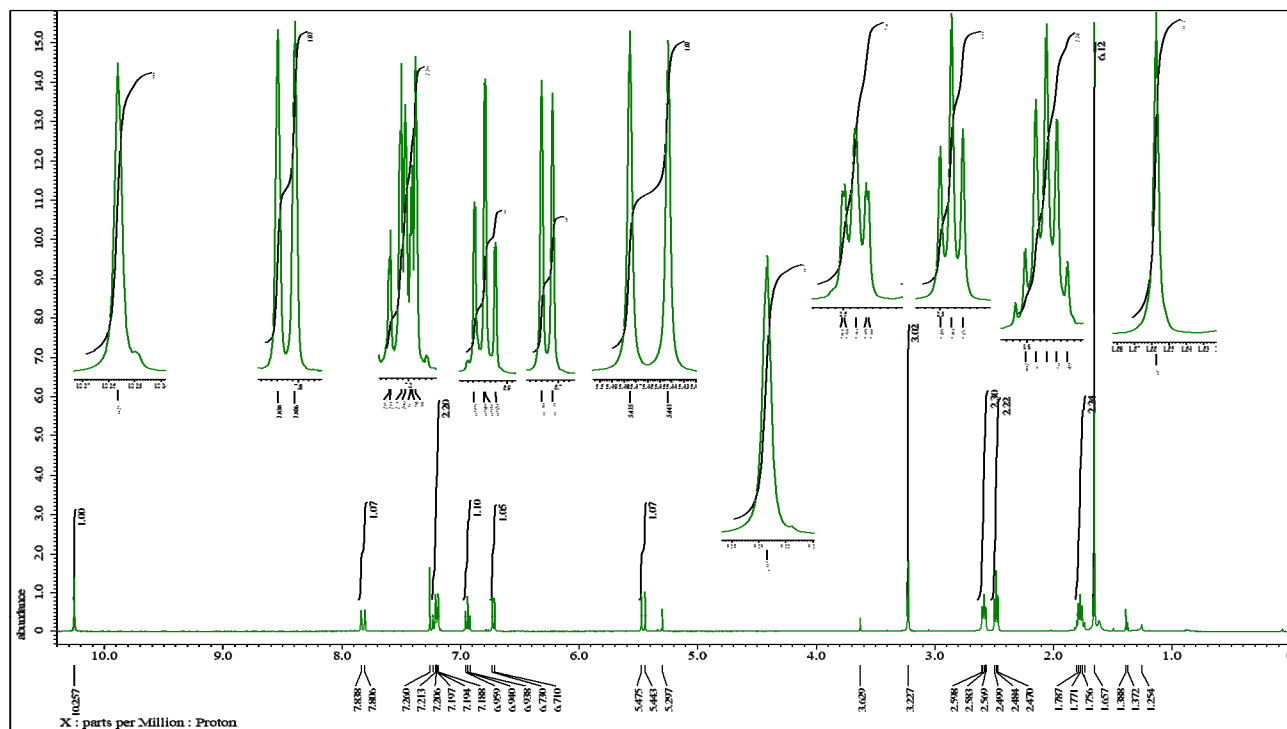

**<sup>13</sup>C NMR**

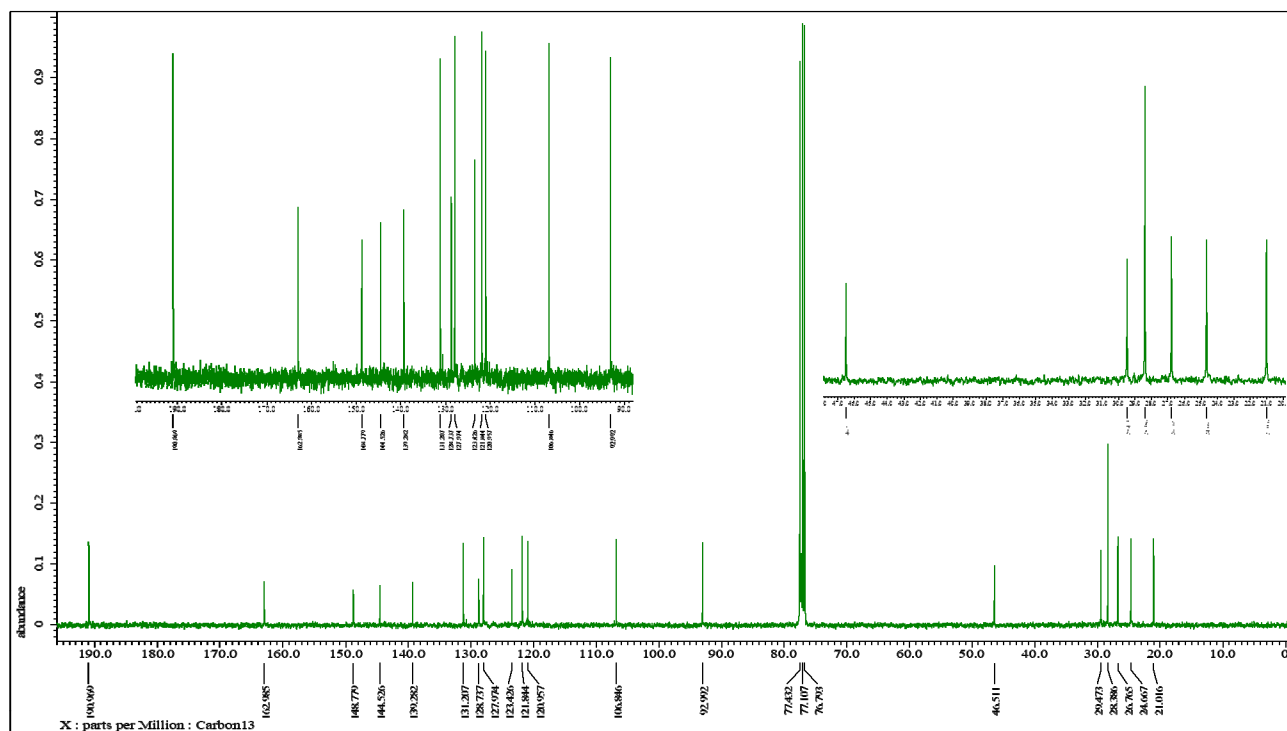

<sup>3</sup> J. W. Yan, J. Y. Zhu, K. X. Zhou, J. S. Wang, H. Y. Tan, Z. Y. Xu, S. B. Chen, Y. T. Lu, M. C. Cui, L. Zhang, *Chem. Commun.* **2017**, 53, 9910-9913.

# IR

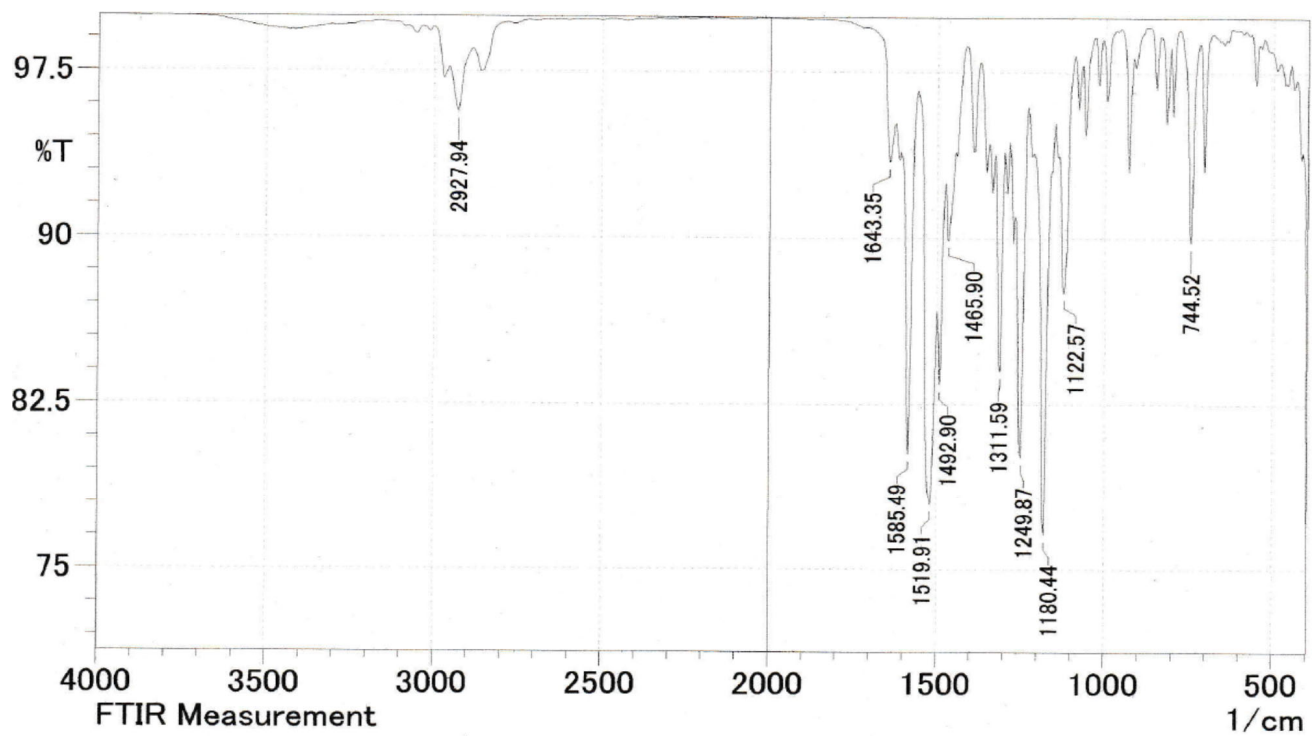

## Fluorescence decay curves

**4a:** CH<sub>2</sub>Cl<sub>2</sub> solution ( $3 \times 10^{-6}$  M)

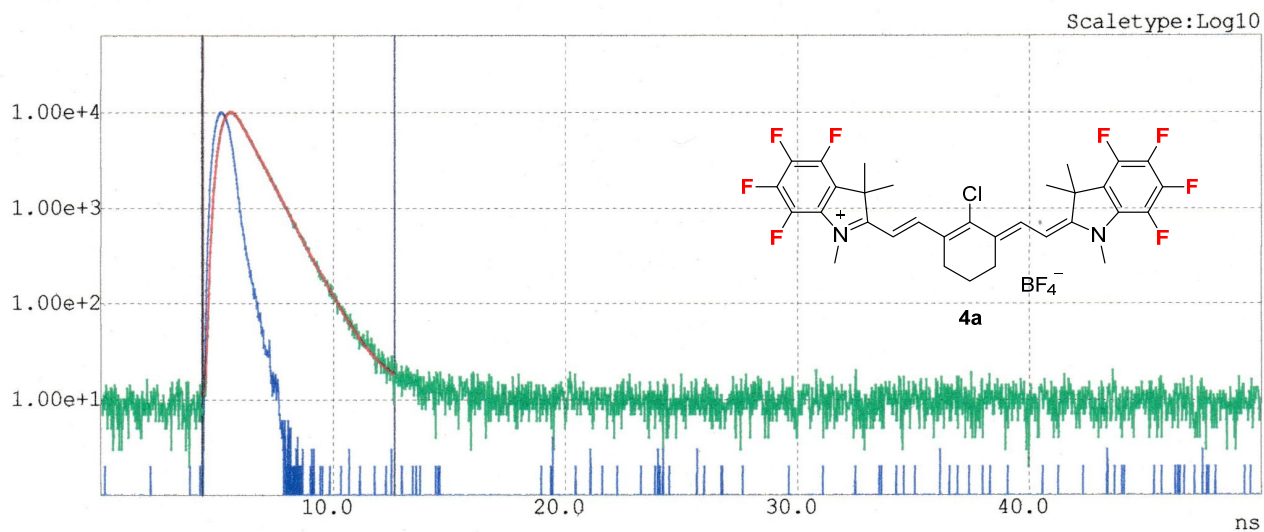

**4b:** CH<sub>2</sub>Cl<sub>2</sub> solution ( $3 \times 10^{-6}$  M)

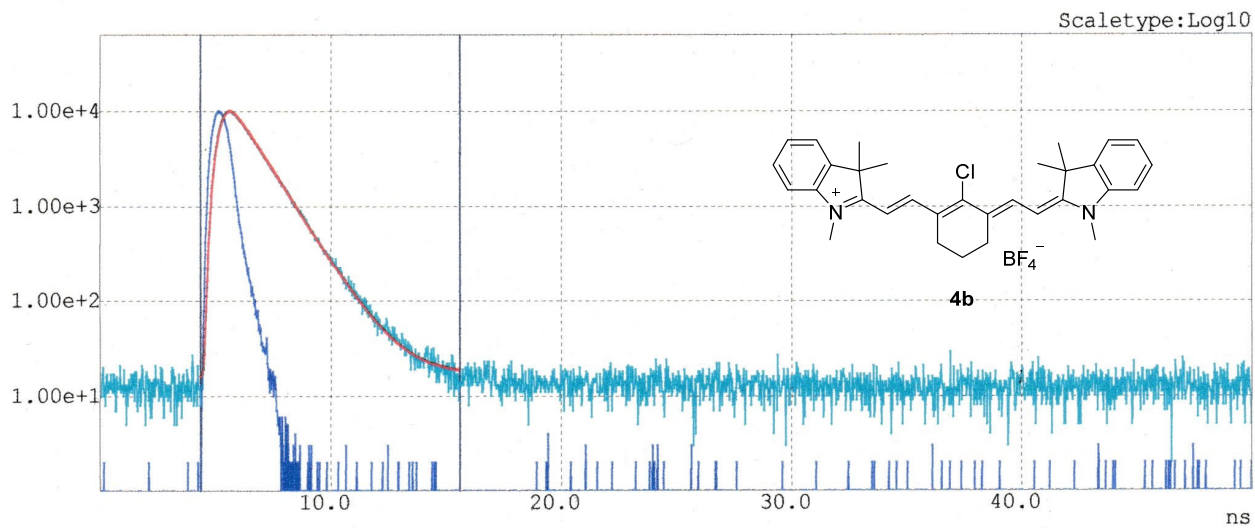

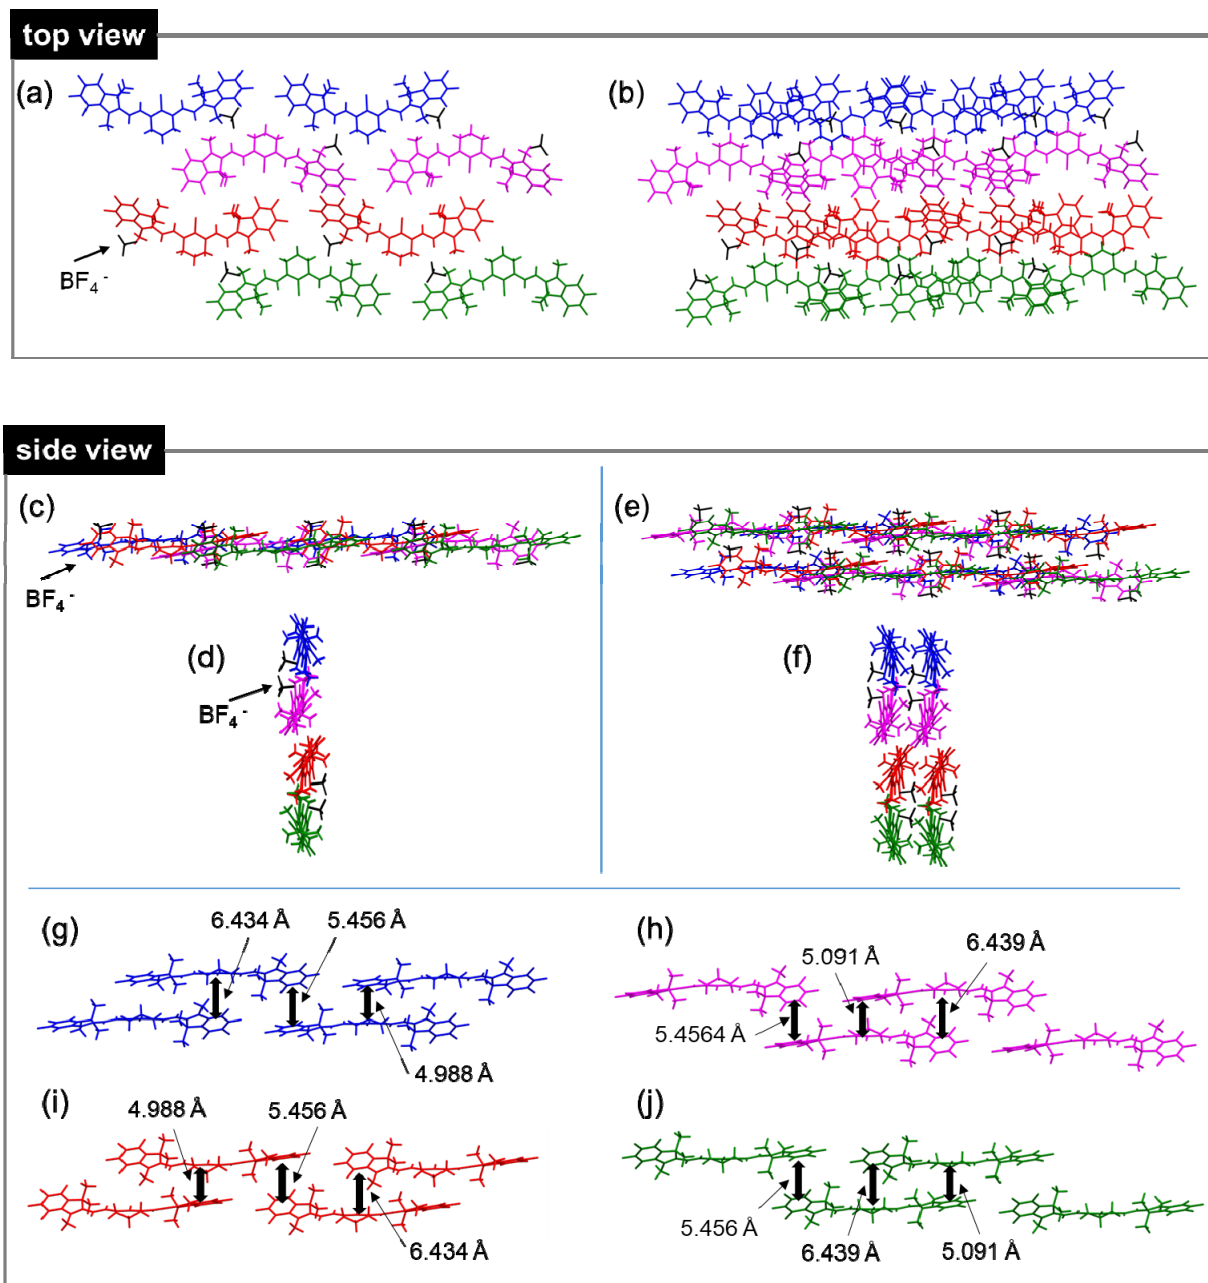

**Figure S1** Packing of the molecules in X-ray diffraction structure of the ring-fluorinated HMCD **4a**: Top view of a single layer (a), top view of double layer (b), side view of a single layer (c), another side view of a single layer (d), side view of double layer (e), another side view of double layer (f), side view of the extracted blue molecules from (e) and the distances between the indolium and the methine double bond (g), side view of the extracted magenta molecules from (e) and the distances between the indolium and the methine double bond (h), side view of the extracted red molecules from (e) and the distances between the indolium and the methine double bond (h), side view of the extracted green molecules from (e) and the distances between the indolium and the methine double bond (h).

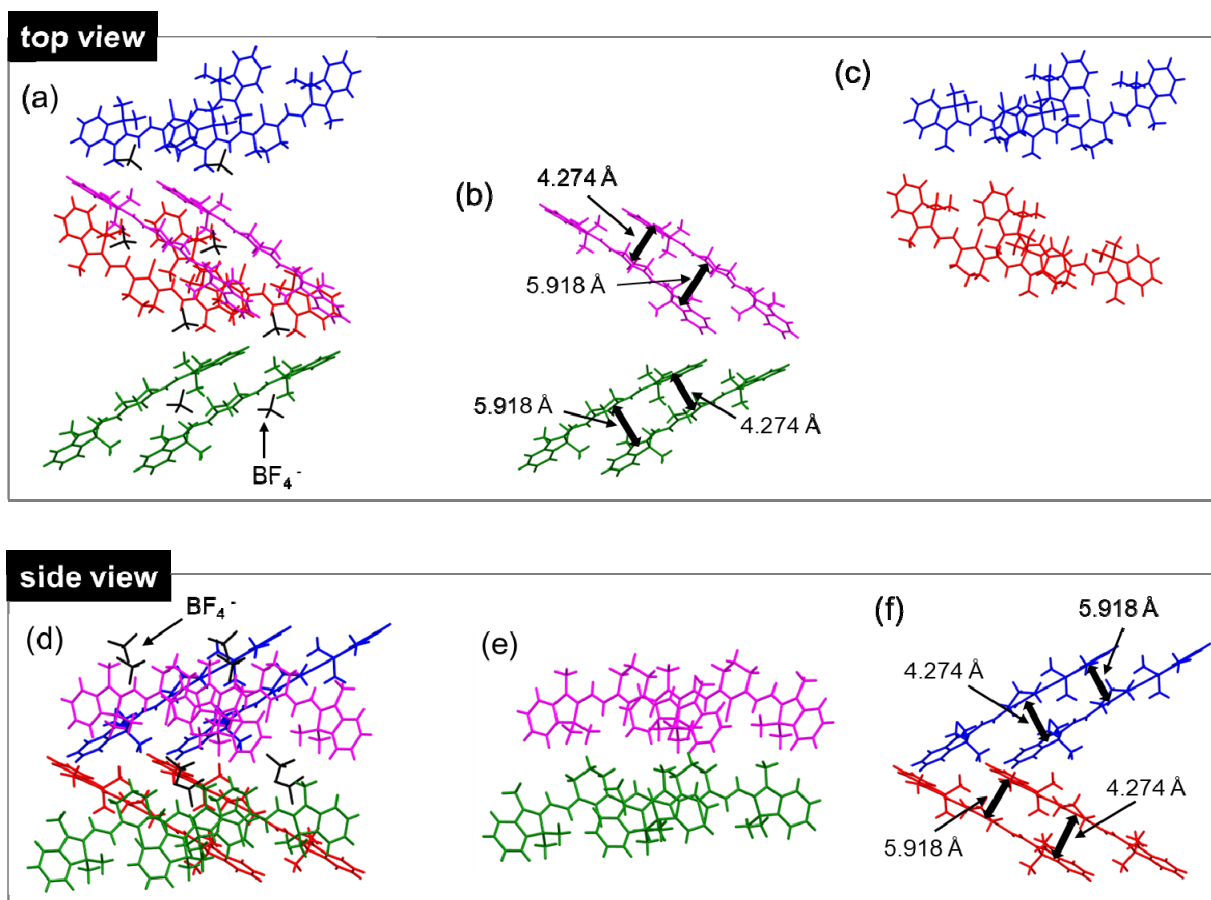

**Figure S2.** Packing of the molecules in X-ray diffraction structure of the HMCD **4b**: Top view (a), the extracted magenta and green molecules from (a) and the distances between indoline and methine double bond (b), extracted blue and red molecules from (a) (c), side view (d), the extracted magenta and green molecules from (d) and the distances between the indolium and the methine double bond (e), the extracted blue and red molecules from (a) and the distances between the indolium and the methine double bond (f).

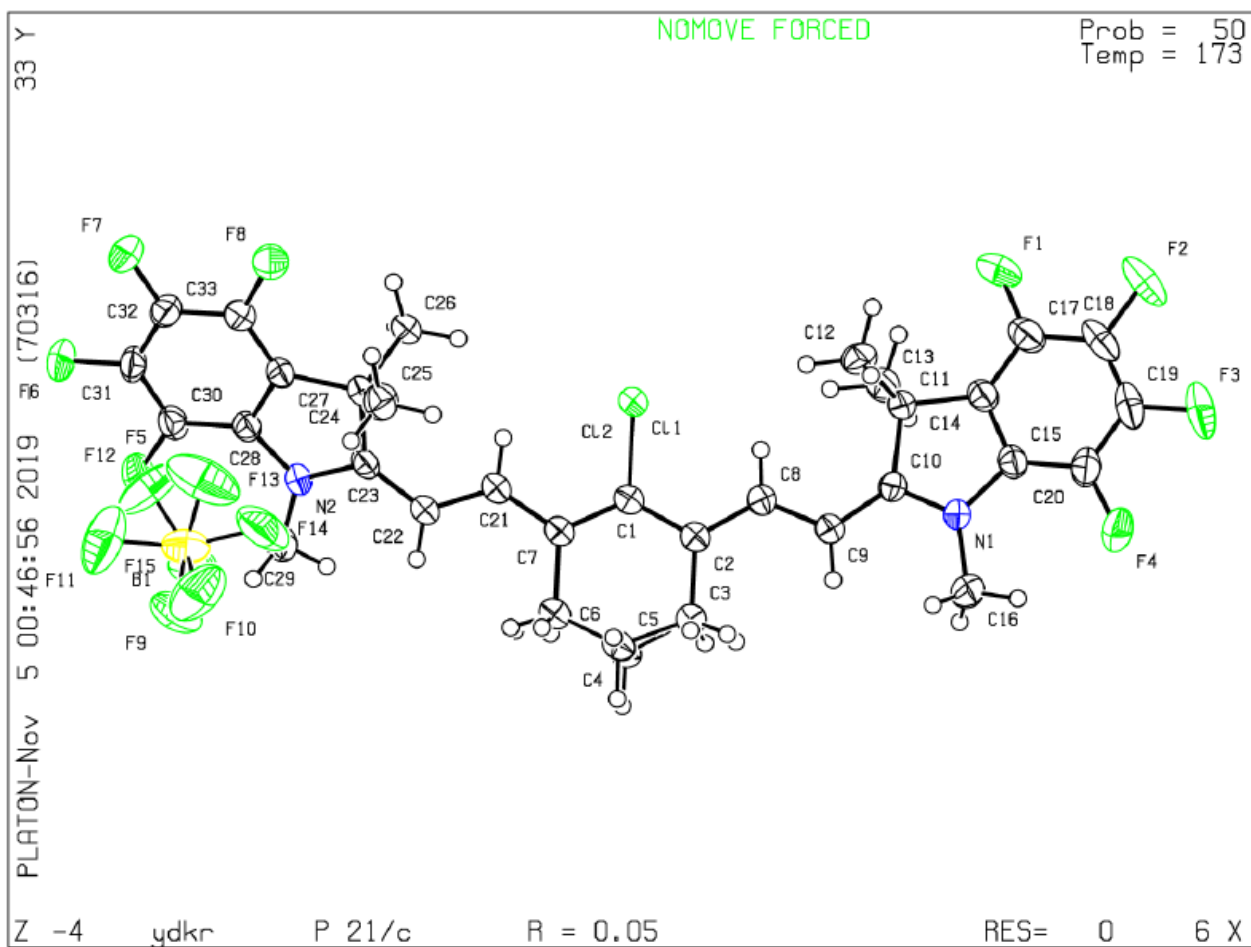

Crystals of ring-fluorinated dye **4a** prepared by the vapor diffusion method with hexane and dichloromethane.

The X-ray Crystal Structure was collected on Rigaku Saturn 724+ CCD diffractometer with a VariMax Mo optic system.

**Figure S3.** ORTEP Diagram of **4a**.

**Table S3.** Crystal Data and Structure Refinement for **4a**.

|                                   |                                                                                                          |
|-----------------------------------|----------------------------------------------------------------------------------------------------------|
| Identification code               | <b>4a</b>                                                                                                |
| Empirical formula                 | C <sub>32</sub> H <sub>28</sub> B Cl F <sub>12</sub> N <sub>2</sub>                                      |
| Formula weight                    | 714.82                                                                                                   |
| Temperature                       | 173(2) K                                                                                                 |
| Wavelength                        | 0.71073 Å                                                                                                |
| Crystal system                    | Monoclinic                                                                                               |
| Space group                       | P2 <sub>1</sub> /c                                                                                       |
| Unit cell dimensions              | a = 9.2949(3) Å      α = 90°.<br>b = 27.7483(8) Å      β = 96.464(3)°.<br>c = 12.3186(4) Å      γ = 90°. |
| Volume                            | 3156.99(17) Å <sup>3</sup>                                                                               |
| Z                                 | 4                                                                                                        |
| Density (calculated)              | 1.504 Mg/m <sup>3</sup>                                                                                  |
| Absorption coefficient            | 0.219 mm <sup>-1</sup>                                                                                   |
| F(000)                            | 1456                                                                                                     |
| Crystal size                      | 0.180 x 0.090 x 0.080 mm <sup>3</sup>                                                                    |
| Theta range for data collection   | 1.818 to 25.497°                                                                                         |
| Index ranges                      | -10 ≤ h ≤ 11, -33 ≤ k ≤ 33, -14 ≤ l ≤ 14                                                                 |
| Reflections collected             | 33500                                                                                                    |
| Independent reflections           | 5855 [R(int) = 0.0514]                                                                                   |
| Completeness to theta = 25.242°   | 99.6%                                                                                                    |
| Refinement method                 | Full-matrix least-squares on F <sup>2</sup>                                                              |
| Data/restraints/parameters        | 5855 / 96 / 489                                                                                          |
| Goodness-of-fit on F <sup>2</sup> | 1.011                                                                                                    |
| Final R indexes [I ≥ 2σ(I)]       | R <sub>1</sub> = 0.0456, wR <sub>2</sub> = 0.1306                                                        |
| Final R indexes (all data)        | R <sub>1</sub> = 0.0583, wR <sub>2</sub> = 0.1401                                                        |
| Extinction coefficient            | n/a                                                                                                      |
| Largest diff. peak and hole       | 0.498 and -0.441 e.Å <sup>-3</sup>                                                                       |

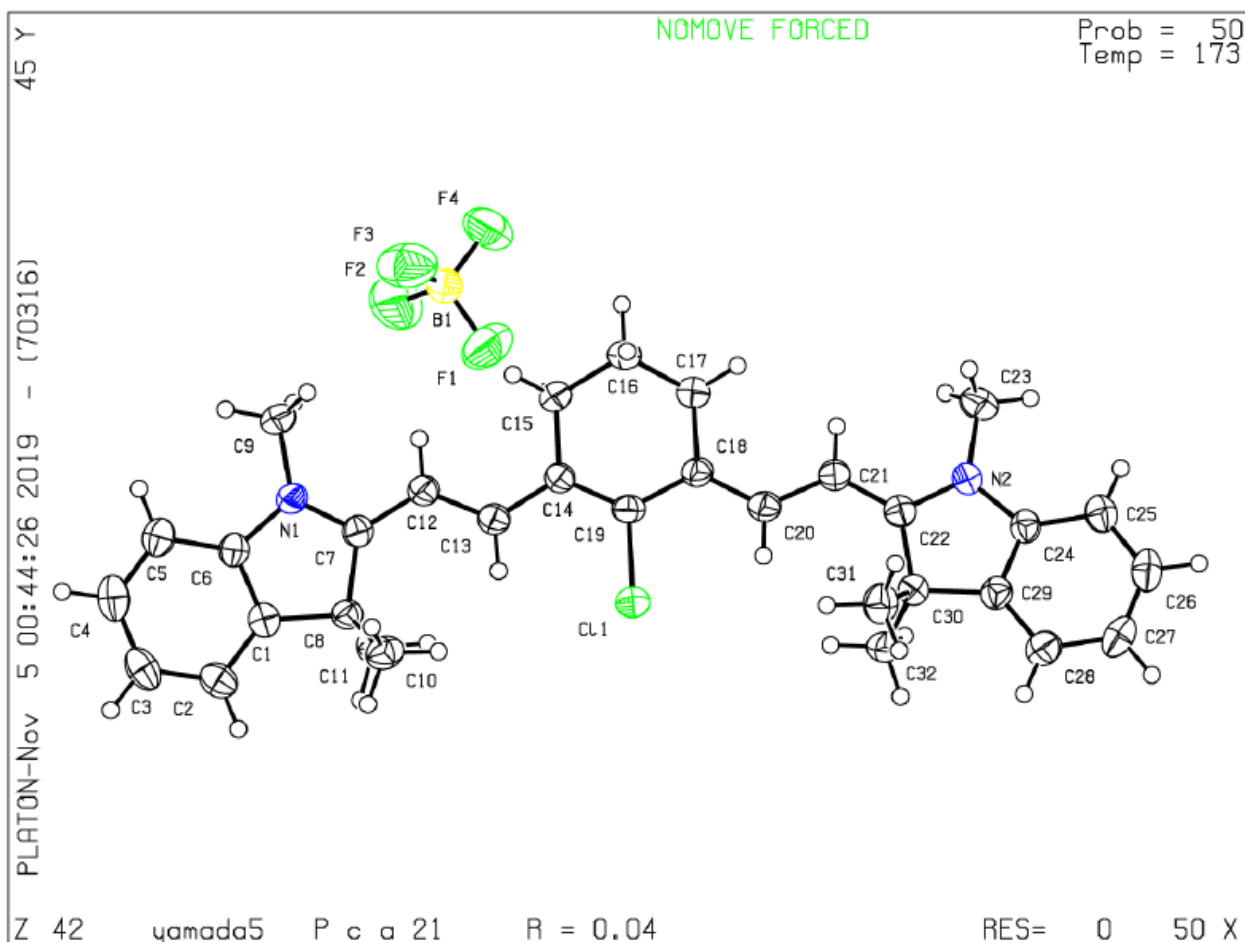

Crystals of non-fluorinated **4b** prepared by the vapor diffusion method with hexane and dichloromethane.

The X-ray Crystal Structure was collected on Rigaku AFC 10 (CCD: Saturn 724+) + VariMax Mo Optic.

**Figure S4.** ORTEP Diagram of **4b**.



**Table S4.** Crystal Data and Structure Refinement for **4b**.

|                                 |                                                                                                   |
|---------------------------------|---------------------------------------------------------------------------------------------------|
| Identification code             | <b>4b</b>                                                                                         |
| Empirical formula               | C <sub>32</sub> H <sub>36</sub> B Cl F <sub>4</sub> N <sub>2</sub>                                |
| Formula weight                  | 570.89                                                                                            |
| Temperature                     | 173(2) K                                                                                          |
| Wavelength                      | 0.71073 Å                                                                                         |
| Crystal system                  | Orthorhombic                                                                                      |
| Space group                     | Pca2 <sub>1</sub>                                                                                 |
| Unit cell dimensions            | a = 31.542(4) Å      α = 90°.<br>b = 7.8263(8) Å      β = 90°.<br>c = 11.5946(12) Å      γ = 90°. |
| Volume                          | 2862.2(6) Å <sup>3</sup>                                                                          |
| Z                               | 4                                                                                                 |
| Density (calculated)            | 1.325                                                                                             |
| Absorption coefficient          | 0.185 mm <sup>-1</sup>                                                                            |
| Absorption coefficient          | 0.185 mm <sup>-1</sup>                                                                            |
| F(000)                          | 1200                                                                                              |
| Crystal size                    | 0.150 x 0.100 x 0.090 mm <sup>3</sup>                                                             |
| Theta range for data collection | 2.180 to 25.496°.                                                                                 |
| Index ranges                    | -38 ≤ h ≤ 37, -9 ≤ k ≤ 9, -11 ≤ l ≤ 14                                                            |
| Reflections collected           | 16438                                                                                             |
| Independent reflections         | 3973 [R(int) = 0.0524]                                                                            |
| Completeness to theta = 25.242° | 99.9 %                                                                                            |
| Absorption correction           | Semi-empirical from equivalents                                                                   |
| Max. and min. transmission      | 1.00000 and 0.89283                                                                               |
| Refinement method               | Full-matrix least-squares on F <sup>2</sup>                                                       |
| Final R indexes [I ≥ 2σ(I)]     | R <sub>1</sub> = 0.0428, wR <sub>2</sub> = 0.0993                                                 |
| R indexes (all data)            | R <sub>1</sub> = 0.0621, wR <sub>2</sub> = 0.1114                                                 |
| Absolute structure parameter    | 0.49(9)                                                                                           |
| Extinction coefficient          | n/a                                                                                               |
| Largest diff. peak and hole     | 0.198 and -0.179 e.Å <sup>-3</sup>                                                                |

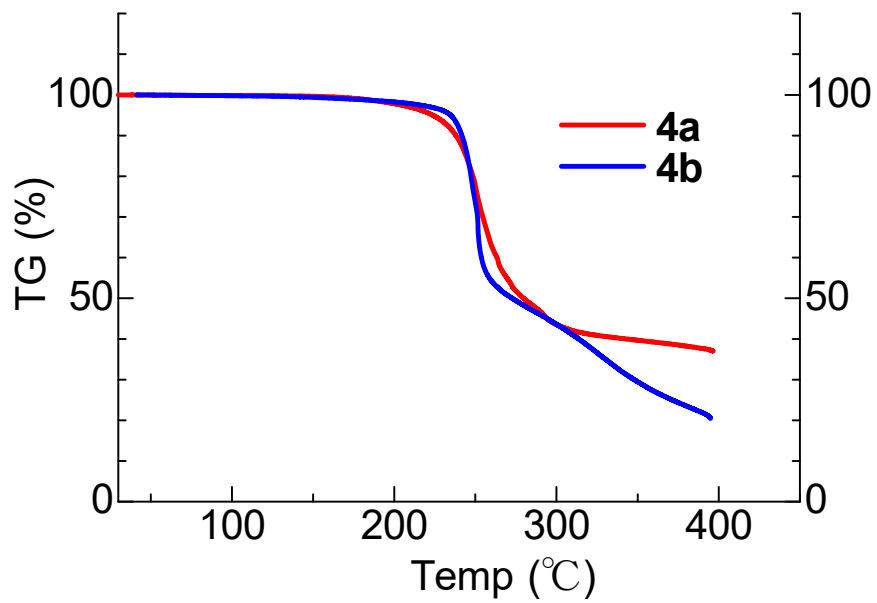

**Figure S5.** TG-DTA of the NIR dyes **4a,b**.

## Electrochemical measurements of the dyes.

Electrochemical measurements of the dyes were performed in MeCN solutions ( $1.0 \times 10^{-3}$  M) containing  $\text{Bu}_4\text{NClO}_4$  (0.1 M). The  $E_{\text{ox}}$  values were measured using three small electrodes. A silver quasi-reference electrode, a platinum wire, and a carbon electrode were used as the reference, counter, and working electrodes, respectively. All the electrode potentials were calibrated concerning the Fc/ferrocenium redox couple. Electrochemical measurements were performed at a scan rate of  $100 \text{ mV s}^{-1}$ . The  $E_{\text{ox}}$  value of Fc vs. SCE was 0.380 V.<sup>4</sup> The  $E_{\text{ox}}$  values vs. SCE were determined using the observed  $E_{\text{ox}}$  (V vs. Ag) values of the dyes in MeCN solutions as follows:

$$E_{\text{ox}} (\text{V vs. SCE}) = E (\text{V vs. Ag, observed value}) + 0.380 - (\text{measured } E_{\text{ox}} \text{ value of Fc for Ag in the MeCN solution}).$$

The energy of the HOMO (eV) was obtained using the  $E_{\text{ox}}$  (V vs. SCE) values, as follows:

$$\text{HOMO (eV)} = -(E_{\text{ox}} (\text{V vs. SCE}) + 4.4)$$

The band gap ( $E_{0-0}$ ) and energy of the LUMO (eV) were calculated using the  $\lambda_{\text{onset}}^{\text{abs}}$  value as follows:

$$E_{0-0} (\text{eV}) = 1240/\lambda_{\text{onset}}^{\text{abs}} (\text{nm})$$

$$\text{LUMO (eV)} = \text{HOMO (eV)} - E_{0-0} (\text{eV})$$

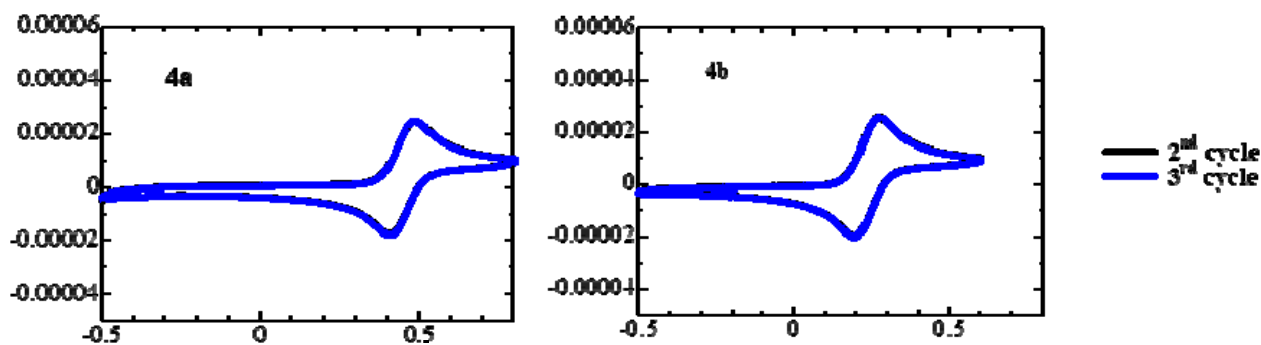

**Figure S6.** Cyclic voltammograms of the NIR dyes **4a,b** ( $1.0 \times 10^{-3}$  M) in dehydrated acetonitrile containing  $\text{Bu}_4\text{NClO}_4$  (0.1 M) as a supporting electrolyte with the scan rate of  $100 \text{ mV s}^{-1}$ .

<sup>4</sup> a) N. G. Connelly, W. E. Geiger, *Chem. Rev.* **1996**, *96*, 2, 877-910. b) C. M. Cardona, W. Li, A. E. Kaifer, D. Stockdale, G. C. Bazan, *Adv. Mater.* **2011**, *23*, 2367-2371.

**Computational Details.** All calculations were performed using the computational chemistry software package Gaussian 16 ver. B.01<sup>5</sup> using (computational resource provided by Fujitsu PRIMERGY CX400) Super Computers at Information and Communications Headquarters in Nagoya University.

**a) Ground State Details.**

Ground state geometries of **4a,b** were computed at RB3LYP/6-31G(d,p) level of theory. At the optimized structures, no imaginary frequency was found through the frequency analysis. All coordinates are reported as XYZ Cartesian coordinates. And computed E (RB3LYP) and sum of zero-point and thermal correction energies of optimized structures are shown.

---

<sup>5</sup> Gaussian 16, Revision B.01, M. J. Frisch, G. W. Trucks, H. B. Schlegel, G. E. Scuseria, M. A. Robb, J. R. Cheeseman, G. Scalmani, V. Barone, G. A. Petersson, H. Nakatsuji, X. Li, M. Caricato, A. V. Marenich, J. Bloino, B. G. Janesko, R. Gomperts, B. Mennucci, H. P. Hratchian, J. V. Ortiz, A. F. Izmaylov, J. L. Sonnenberg, D. Williams-Young, F. Ding, F. Lipparini, F. Egidi, J. Goings, B. Peng, A. Petrone, T. Henderson, D. Ranasinghe, V. G. Zakrzewski, J. Gao, N. Rega, G. Zheng, W. Liang, M. Hada, M. Ehara, K. Toyota, R. Fukuda, J. Hasegawa, M. Ishida, T. Nakajima, Y. Honda, O. Kitao, H. Nakai, T. Vreven, K. Throssell, J. A. Montgomery, Jr., J. E. Peralta, F. Ogliaro, M. J. Bearpark, J. J. Heyd, E. N. Brothers, K. N. Kudin, V. N. Staroverov, T. A. Keith, R. Kobayashi, J. Normand, K. Raghavachari, A. P. Rendell, J. C. Burant, S. S. Iyengar, J. Tomasi, M. Cossi, J. M. Millam, M. Klene, C. Adamo, R. Cammi, J. W. Ochterski, R. L. Martin, K. Morokuma, O. Farkas, J. B. Foresman, and D. J. Fox, Gaussian, Inc., Wallingford CT, 2016.

**4a**

E (RB3LYP) = -2604.434712 a.u.

Sum of electronic and thermal Energies = -2603.852902 a.u.

Imaginary Frequency = 0

**Table S1.** Cartesian coordinates of the optimized **4a**.

| Coordinates (Angstroms) |           |           |           |
|-------------------------|-----------|-----------|-----------|
| Atom                    | X         | Y         | Z         |
| C                       | -1.302587 | 0.296696  | -0.178903 |
| C                       | -1.135813 | 1.262569  | -0.641161 |
| C                       | -0.310731 | -0.534105 | 0.184597  |
| C                       | -0.611245 | -1.509123 | 0.563213  |
| C                       | -2.741576 | -0.074322 | -0.051169 |
| N                       | -3.409253 | 0.81211   | 0.731417  |
| C                       | -3.363575 | -0.06148  | -1.255068 |
| H                       | -2.931427 | -1.299724 | 0.485802  |
| H                       | 1.138025  | -0.343567 | 0.097905  |
| H                       | 1.78638   | 0.920585  | 0.0353    |
| C                       | 1.938209  | -1.50268  | 0.082948  |
| H                       | 3.185277  | 0.961545  | -0.096029 |
| C                       | 3.319188  | -1.451404 | -0.049823 |
| H                       | 1.441513  | -2.466475 | 0.159551  |
| C                       | 3.940482  | -0.203284 | -0.149681 |
| H                       | 3.676574  | 1.930065  | -0.150192 |
| C                       | 3.903539  | -2.365136 | -0.072432 |
| H                       | 5.019541  | -0.135223 | -0.25276  |
| C                       | 1.067552  | 2.114207  | 0.078235  |
| C                       | 0.224126  | 2.083868  | 0.637484  |
| C                       | 1.631186  | 2.925078  | 0.29843   |
| C                       | 3.8614237 | 0.7802288 | 0.1389195 |
| C                       | 4.1411835 | 0.8452704 | 0.1495673 |
| C                       | 4.4209433 | 0.9103119 | 0.1602151 |
| N                       | 4.7007031 | 0.9753535 | 0.1708629 |
| C                       | 4.9804629 | 1.0403951 | 0.1815107 |
| H                       | 5.2602227 | 1.1054367 | 0.1921585 |
| H                       | 5.5399825 | 1.1704783 | 0.2028063 |
| H                       | 5.8197423 | 1.2355198 | 0.2134541 |
| C                       | 6.0995021 | 1.3005614 | 0.2241019 |
| C                       | 6.3792619 | 1.365603  | 0.2347498 |
| C                       | 6.6590217 | 1.4306446 | 0.2453976 |
| H                       | 6.9387815 | 1.4956861 | 0.2560454 |
| H                       | 7.2185413 | 1.5607277 | 0.2666932 |
| C                       | 7.4983011 | 1.6257693 | 0.277341  |
| C                       | 7.7780609 | 1.6908109 | 0.2879888 |
| H                       | 8.0578207 | 1.7558525 | 0.2986366 |
| H                       | 8.3375804 | 1.820894  | 0.3092844 |
| C                       | 8.6173402 | 1.8859356 | 0.3199323 |
| H                       | 8.8971    | 1.9509772 | 0.3305801 |
| H                       | 9.1768598 | 2.0160188 | 0.3412279 |
| C                       | 9.4566196 | 2.0810603 | 0.3518757 |
| Cl                      | 9.7363794 | 2.1461019 | 0.3625235 |
| C                       | 10.016139 | 2.2111435 | 0.3731713 |
| C                       | 10.295899 | 2.2761851 | 0.3838191 |
| C                       | 10.575659 | 2.3412267 | 0.3944669 |
| H                       | 10.855419 | 2.4062682 | 0.4051147 |
| H                       | 11.135178 | 2.4713098 | 0.4157626 |
| H                       | 11.414938 | 2.5363514 | 0.4264104 |
| C                       | 11.694698 | 2.601393  | 0.4370582 |
| H                       | 11.974458 | 2.6664345 | 0.447706  |
| H                       | 12.254218 | 2.7314761 | 0.4583538 |
| H                       | 12.533977 | 2.7965177 | 0.4690016 |
| C                       | 12.813737 | 2.8615593 | 0.4796494 |
| H                       | 13.093497 | 2.9266009 | 0.4902972 |
| H                       | 13.373257 | 2.9916424 | 0.500945  |
| H                       | 13.653017 | 3.056684  | 0.5115929 |
| C                       | 13.932776 | 3.1217256 | 0.5222407 |
| H                       | 14.212536 | 3.1867672 | 0.5328885 |
| H                       | 14.492296 | 3.2518087 | 0.5435363 |
| H                       | 14.772056 | 3.3168503 | 0.5541841 |

|   |           |           |           |   |           |           |           |
|---|-----------|-----------|-----------|---|-----------|-----------|-----------|
| C | 15.051816 | 3.3818919 | 0.5648319 | F | 16.730374 | 3.7721414 | 0.6287188 |
| C | 15.331575 | 3.4469335 | 0.5754797 | F | 17.010134 | 3.8371829 | 0.6393666 |
| F | 15.611335 | 3.5119751 | 0.5861275 | F | 17.289894 | 3.9022245 | 0.6500144 |
| F | 15.891095 | 3.5770166 | 0.5967754 | F | 17.569654 | 3.9672661 | 0.6606622 |
| F | 16.170855 | 3.6420582 | 0.6074232 |   |           |           |           |
| F | 16.450615 | 3.7070998 | 0.618071  |   |           |           |           |

#### **4b**

E (RB3LYP) = -1810.652960 a.u.

Sum of electronic and thermal Energies = -1810.013174 a.u.

Imaginary Frequency = 0

**Table S2.** Cartesian coordinates of the optimized **4b**

| Atom | Coordinates (Angstroms) |           |           | Atom | X         | Y         | Z         |
|------|-------------------------|-----------|-----------|------|-----------|-----------|-----------|
|      | X                       | Y         | Z         |      |           |           |           |
| C    | -1.302587               | 0.296696  | -0.178903 | C    | 3.8614237 | 0.7802288 | 0.1389195 |
| C    | -1.135813               | 1.262569  | -0.641161 | C    | 4.1411835 | 0.8452704 | 0.1495673 |
| C    | -0.310731               | -0.534105 | 0.184597  | C    | 4.4209433 | 0.9103119 | 0.1602151 |
| C    | -0.611245               | -1.509123 | 0.563213  | N    | 4.7007031 | 0.9753535 | 0.1708629 |
| C    | -2.741576               | -0.074322 | -0.051169 | C    | 4.9804629 | 1.0403951 | 0.1815107 |
| N    | -3.409253               | 0.81211   | 0.731417  | H    | 5.2602227 | 1.1054367 | 0.1921585 |
| C    | -3.363575               | -0.06148  | -1.255068 | H    | 5.5399825 | 1.1704783 | 0.2028063 |
| H    | -2.931427               | -1.299724 | 0.485802  | H    | 5.8197423 | 1.2355198 | 0.2134541 |
| H    | 1.138025                | -0.343567 | 0.097905  | C    | 6.0995021 | 1.3005614 | 0.2241019 |
| H    | 1.78638                 | 0.920585  | 0.0353    | C    | 6.3792619 | 1.365603  | 0.2347498 |
| C    | 1.938209                | -1.50268  | 0.082948  | C    | 6.6590217 | 1.4306446 | 0.2453976 |
| H    | 3.185277                | 0.961545  | -0.096029 | H    | 6.9387815 | 1.4956861 | 0.2560454 |
| C    | 3.319188                | -1.451404 | -0.049823 | H    | 7.2185413 | 1.5607277 | 0.2666932 |
| H    | 1.441513                | -2.466475 | 0.159551  | C    | 7.4983011 | 1.6257693 | 0.277341  |
| C    | 3.940482                | -0.203284 | -0.149681 | C    | 7.7780609 | 1.6908109 | 0.2879888 |
| H    | 3.676574                | 1.930065  | -0.150192 | H    | 8.0578207 | 1.7558525 | 0.2986366 |
| C    | 3.903539                | -2.365136 | -0.072432 | H    | 8.3375804 | 1.820894  | 0.3092844 |
| H    | 5.019541                | -0.135223 | -0.25276  | C    | 8.6173402 | 1.8859356 | 0.3199323 |
| C    | 1.067552                | 2.114207  | 0.078235  | H    | 8.8971    | 1.9509772 | 0.3305801 |
| C    | 0.224126                | 2.083868  | 0.637484  | H    | 9.1768598 | 2.0160188 | 0.3412279 |
| C    | 1.631186                | 2.925078  | 0.29843   | C    | 9.4566196 | 2.0810603 | 0.3518757 |
|      |                         |           |           | Cl   | 9.7363794 | 2.1461019 | 0.3625235 |
|      |                         |           |           | C    | 10.016139 | 2.2111435 | 0.3731713 |
|      |                         |           |           | C    | 10.295899 | 2.2761851 | 0.3838191 |

|   |           |           |           |   |           |           |           |
|---|-----------|-----------|-----------|---|-----------|-----------|-----------|
| C | 10.575659 | 2.3412267 | 0.3944669 | H | 14.492296 | 3.2518087 | 0.5435363 |
| H | 10.855419 | 2.4062682 | 0.4051147 | H | 14.772056 | 3.3168503 | 0.5541841 |
| H | 11.135178 | 2.4713098 | 0.4157626 | C | 15.051816 | 3.3818919 | 0.5648319 |
| H | 11.414938 | 2.5363514 | 0.4264104 | C | 15.331575 | 3.4469335 | 0.5754797 |
| C | 11.694698 | 2.601393  | 0.4370582 | H | 15.611335 | 3.5119751 | 0.5861275 |
| H | 11.974458 | 2.6664345 | 0.447706  | H | 15.891095 | 3.5770166 | 0.5967754 |
| H | 12.254218 | 2.7314761 | 0.4583538 | H | 16.170855 | 3.6420582 | 0.6074232 |
| H | 12.533977 | 2.7965177 | 0.4690016 | H | 16.450615 | 3.7070998 | 0.618071  |
| C | 12.813737 | 2.8615593 | 0.4796494 | H | 16.730374 | 3.7721414 | 0.6287188 |
| H | 13.093497 | 2.9266009 | 0.4902972 | H | 17.010134 | 3.8371829 | 0.6393666 |
| H | 13.373257 | 2.9916424 | 0.500945  | H | 17.289894 | 3.9022245 | 0.6500144 |
| H | 13.653017 | 3.056684  | 0.5115929 | H | 17.569654 | 3.9672661 | 0.6606622 |
| C | 13.932776 | 3.1217256 | 0.5222407 |   |           |           |           |
| H | 14.212536 | 3.1867672 | 0.5328885 |   |           |           |           |

---
